# Supplementary material
Source: PubMed Central journal article supplement (PMC6563537)
Supplement: jamainternmed-179-1025-s001.pdf [file jamainternmed-179-1025-s001.pdf]

## Supplementary Online Content

Noel JA, Bota SE, Petrcich W, et al. Risk of hospitalization for serious adverse gastrointestinal events associated with sodium polystyrene sulfonate use in patients of advanced age. *JAMA Intern Med*. Published online June 10, 2019. doi:10.1001/jamainternmed.2019.0631

**eTable 1.** Reporting of Studies Conducted Using Observational Routinely-Collected Health Data (RECORD) Statement Checklist

**eTable 2.** Administrative Data Definitions

**eTable 3.** Ontario Drug Benefit Program Drug Identification Numbers Used to Define Exposure and Baseline Variables

**eTable 4.** Covariates Included in High Dimensional Propensity Score (HDPS)

**eTable 5.** Covariates Included in HDPS Score for Matched Subcohort With Known Baseline eGFR and Serum Potassium Values

**eTable 6.** Baseline Characteristics of Sodium Polystyrene Sulfonate (SPS) and Non-SPS Users Post-Matching in the Subcohort With Known Baseline eGFR and Serum Potassium Values

**eTable 7.** Association Between Sodium Polystyrene Sulfonate (SPS) Use and a Negative Control (Composite of Hospitalization or Emergency Room Visit for Cholecystitis, Diverticulitis or Appendicitis With 30-Day Follow-up)

**eFigure.** Cohort Creation Flow Diagram

**eMethods.**

This supplementary material has been provided by the authors to give readers additional information about their work.

## Additional Methodological Details

### High Dimensional Propensity Score:

The databases included were DAD, NACRS, SDS, OHIP, ODB with data dimensions as follows: OHIP: feecode, dxcode, DAD-SDS, NACRS: dx10code1, incode1, and ODB: subclname. The look back windows were 1 year for all HDPS variables. For assessment of recurrence we generated binary variables as follows: occurred  $\geq 1$  time, occurred  $\geq$  median number of times, and occurred  $\geq 75^{\text{th}}$  percentile number of times. Prioritization and covariate selection was based on the top 200 variables as ranked by the bias term.

**eFigure.** Cohort Creation Flow Diagram

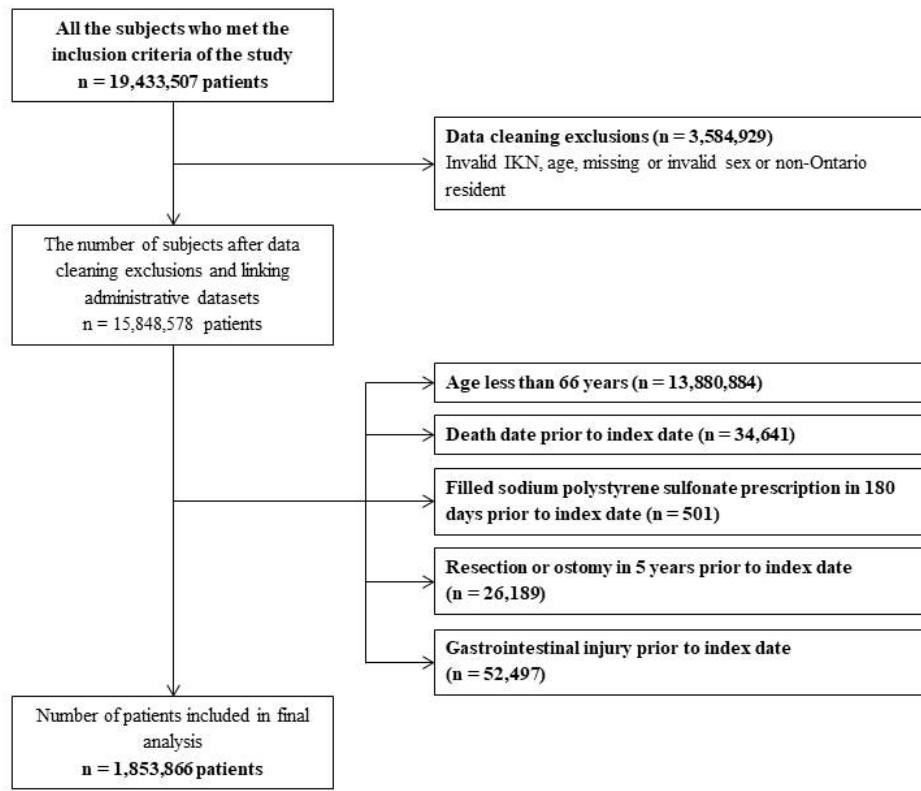

**eTable 1.** Reporting of Studies Conducted Using Observational Routinely-Collected Health Data (RECORD) Statement Checklist

|                           | <b>Item No</b> | <b>STROBE items</b>                                                                                                                                                                             | <b>RECORD items</b>                                                                                                                                                                                                                                                                                                                                                                                                | <b>Reported</b>         |
|---------------------------|----------------|-------------------------------------------------------------------------------------------------------------------------------------------------------------------------------------------------|--------------------------------------------------------------------------------------------------------------------------------------------------------------------------------------------------------------------------------------------------------------------------------------------------------------------------------------------------------------------------------------------------------------------|-------------------------|
| <b>Title and abstract</b> | 1              | (a) Indicate the study's design with a commonly used term in the title or the abstract.<br>(b) Provide in the abstract an informative and balanced summary of what was done and what was found. | (1.1) The type of data used should be specified in the title or abstract. When possible, the name of the databases used should be included.<br>(1.2) If applicable, the geographic region and time frame within which the study took place should be reported in the title or abstract.<br>(1.3) If linkage between databases was conducted for the study, this should be clearly stated in the title or abstract. | Title page and abstract |
| <b>Introduction</b>       |                |                                                                                                                                                                                                 |                                                                                                                                                                                                                                                                                                                                                                                                                    |                         |
| Background/rationale      | 2              | Explain the scientific background and rationale for the investigation being reported.                                                                                                           |                                                                                                                                                                                                                                                                                                                                                                                                                    | Introduction            |
| Objectives                | 3              | State specific objectives, including any pre-specified hypotheses.                                                                                                                              |                                                                                                                                                                                                                                                                                                                                                                                                                    | Introduction            |
| <b>Methods</b>            |                |                                                                                                                                                                                                 |                                                                                                                                                                                                                                                                                                                                                                                                                    |                         |
| Study design              | 4              | Present key elements of study design early in the paper.                                                                                                                                        |                                                                                                                                                                                                                                                                                                                                                                                                                    | Methods                 |
| Setting                   | 5              | Describe the setting, locations, and relevant dates, including periods of recruitment, exposure, follow-up, and data collection.                                                                |                                                                                                                                                                                                                                                                                                                                                                                                                    | Methods                 |
| Participants              | 6              | (a) Give the eligibility criteria, and the sources and methods of selection of participants. Describe methods of follow-up.                                                                     | (6.1) The methods of study population selection (such as codes or algorithms used to identify subjects) should be listed in detail. If this is not                                                                                                                                                                                                                                                                 | Methods                 |

|                              |    |                                                                                                                                                                                       |                                                                                                                                                                                                                                                                                                                                                                                                                                                                                                                  |         |
|------------------------------|----|---------------------------------------------------------------------------------------------------------------------------------------------------------------------------------------|------------------------------------------------------------------------------------------------------------------------------------------------------------------------------------------------------------------------------------------------------------------------------------------------------------------------------------------------------------------------------------------------------------------------------------------------------------------------------------------------------------------|---------|
|                              |    | (b) For matched studies, give matching criteria and number of exposed and unexposed.                                                                                                  | possible, an explanation should be provided.<br>(6.2) Any validation studies of the codes or algorithms used to select the population should be referenced. If validation was conducted for this study and not published elsewhere, detailed methods and results should be provided.<br>(6.3) If the study involved linkage of databases, consider use of a flow diagram or other graphical display to demonstrate the data linkage process, including the number of individuals with linked data at each stage. |         |
| Variables                    | 7  | Clearly define all outcomes, exposures, predictors, potential confounders, and effect modifiers. Give diagnostic criteria, if applicable.                                             | (7.1) A complete list of codes and algorithms used to classify exposures, outcomes, confounders, and effect modifiers should be provided. If these cannot be reported, an explanation should be provided.                                                                                                                                                                                                                                                                                                        | Methods |
| Data sources/<br>measurement | 8  | For each variable of interest, give sources of data and details of methods of assessment (measurement). Describe comparability of assessment methods if there is more than one group. |                                                                                                                                                                                                                                                                                                                                                                                                                                                                                                                  | Methods |
| Bias                         | 9  | Describe any efforts to address potential sources of bias.                                                                                                                            |                                                                                                                                                                                                                                                                                                                                                                                                                                                                                                                  | Methods |
| Study size                   | 10 | Explain how the study size was arrived at.                                                                                                                                            |                                                                                                                                                                                                                                                                                                                                                                                                                                                                                                                  | Results |

|                                  |    |                                                                                                                                                                                                                                                                                                                             |                                                                                                                                                                                                                                              |         |
|----------------------------------|----|-----------------------------------------------------------------------------------------------------------------------------------------------------------------------------------------------------------------------------------------------------------------------------------------------------------------------------|----------------------------------------------------------------------------------------------------------------------------------------------------------------------------------------------------------------------------------------------|---------|
| Quantitative variables           | 11 | Explain how quantitative variables were handled in the analyses. If applicable, describe which groupings were chosen and why.                                                                                                                                                                                               |                                                                                                                                                                                                                                              | Methods |
| Statistical methods              | 12 | (a) Describe all statistical methods, including those used to control for confounding.<br>(b) Describe any methods used to examine subgroups and interactions.<br>(c) Explain how missing data were addressed.<br>(d) If applicable, explain how loss to follow-up was addressed.<br>(e) Describe any sensitivity analyses. |                                                                                                                                                                                                                                              | Methods |
| Data access and cleaning methods |    | N/A                                                                                                                                                                                                                                                                                                                         | (12.1) Authors should describe the extent to which the investigators had access to the database population used to create the study population.<br>(12.2) Authors should provide information on the data cleaning methods used in the study. | Methods |
| Linkage                          |    | N/A                                                                                                                                                                                                                                                                                                                         | (12.3) State whether the study included person-level, institutional-level, or other data linkage across two or more databases. The methods of linkage and methods of linkage quality evaluation should be provided.                          | Methods |
| <b>Results</b>                   |    |                                                                                                                                                                                                                                                                                                                             |                                                                                                                                                                                                                                              |         |

|                  |    |                                                                                                                                                                                                                                                                                                       |                                                                                                                                                                                                                                                                                                       |                                  |
|------------------|----|-------------------------------------------------------------------------------------------------------------------------------------------------------------------------------------------------------------------------------------------------------------------------------------------------------|-------------------------------------------------------------------------------------------------------------------------------------------------------------------------------------------------------------------------------------------------------------------------------------------------------|----------------------------------|
| Participants     | 13 | (a) Report numbers of individuals at each stage of study- e.g. numbers potentially eligible, examined for eligibility, confirmed eligible, included in the study, completing follow-up, and analyzed.<br>(b) Give reasons for non-participation at each stage.<br>(c) Consider use of a flow diagram. | (13.1) Describe in detail the selection of the persons included in the study (i.e., study population selection), including filtering based on data quality, data availability, and linkage. The selection of included persons can be described in the text and/or by means of the study flow diagram. | Results, Supplemental Appendices |
| Descriptive data | 14 | (a) Give characteristics of study participants (e.g. demographic, clinical, social) and information on exposures and potential confounders.<br>(b) Indicate number of participants with missing data for each variable of interest.<br>(c) Summarize follow-up time (e.g. average and total amount).  |                                                                                                                                                                                                                                                                                                       | Results                          |
| Outcome data     | 15 | Report numbers of outcome events or summary measures over time.                                                                                                                                                                                                                                       |                                                                                                                                                                                                                                                                                                       | Results                          |
| Main results     | 16 | (a) Give unadjusted estimates and, if applicable, confounder-adjusted estimates and their precision (e.g. 95% confidence interval). Make clear which confounders were adjusted for and why they were included.                                                                                        |                                                                                                                                                                                                                                                                                                       | Results                          |

|                          |    |                                                                                                                                                                                                 |                                                                                                                                                                                                                                                                                                    |                                  |
|--------------------------|----|-------------------------------------------------------------------------------------------------------------------------------------------------------------------------------------------------|----------------------------------------------------------------------------------------------------------------------------------------------------------------------------------------------------------------------------------------------------------------------------------------------------|----------------------------------|
|                          |    | (b) Report category boundaries when continuous variables were categorized.<br>(c) If relevant, consider translating estimates of relative risk into absolute risk for a meaningful time period. |                                                                                                                                                                                                                                                                                                    |                                  |
| Other analyses           | 17 | Report other analyses done (e.g. analyses of subgroups and interactions, and sensitivity analyses).                                                                                             |                                                                                                                                                                                                                                                                                                    | Results, Supplemental Appendices |
| Key results              | 18 | Summarize key results with reference to study objectives.                                                                                                                                       |                                                                                                                                                                                                                                                                                                    | Discussion                       |
| Limitations              | 19 | Discuss limitations of the study, taking into account sources of potential bias or imprecision. Discuss both direction and magnitude of any potential bias.                                     | (19.1) Discuss the implications of using data that were not created or collected to answer the specific research question(s). Include discussion of misclassification bias, unmeasured confounding, missing data, and changing eligibility over time, as they pertain to the study being reported. | Discussion                       |
| Interpretation           | 20 | Give a cautious overall interpretation of results considering objectives, limitations, multiplicity of analyses, results from similar studies, and other relevant evidence.                     |                                                                                                                                                                                                                                                                                                    | Discussion                       |
| Generalizability         | 21 | Discuss the generalizability (external validity) of the study results.                                                                                                                          |                                                                                                                                                                                                                                                                                                    | Discussion                       |
| <b>Other information</b> |    |                                                                                                                                                                                                 |                                                                                                                                                                                                                                                                                                    |                                  |



|                                                           |    |                                                                                                                                                                |                                                                                                                                                    |                  |
|-----------------------------------------------------------|----|----------------------------------------------------------------------------------------------------------------------------------------------------------------|----------------------------------------------------------------------------------------------------------------------------------------------------|------------------|
| Funding                                                   | 22 | Give the source of funding and the role of the funders for the present study and, if applicable, for the original study on which the present article is based. |                                                                                                                                                    | Acknowledgements |
| Accessibility of protocol, raw data, and programming code |    | N/A                                                                                                                                                            | (22.1) Authors should provide information on how to access any supplemental information such as the study protocol, raw data, or programming code. |                  |

Reference: Benchimol EI, Smeeth L, Guttman A, Harron K, Moher D, Petersen I, Sørensen HT, von Elm E, Langan SM; RECORD Working Committee. The REporting of studies Conducted using Observational Routinely-collected health Data (RECORD) statement. 2015. PLoS Med. 12(10):1-22.

**eTable 2. Administrative Data Definitions**

| <b>Concept</b>                                                                                                                            | <b>Data Source</b>                                                                                                                    | <b>Definition</b>                                                                                                                                                                                                                                                                                                                                |
|-------------------------------------------------------------------------------------------------------------------------------------------|---------------------------------------------------------------------------------------------------------------------------------------|--------------------------------------------------------------------------------------------------------------------------------------------------------------------------------------------------------------------------------------------------------------------------------------------------------------------------------------------------|
| Adverse gastrointestinal events (composite of intestinal ischemia, thrombosis, resection, ostomy, gastrointestinal ulcers or perforation) | Canadian Institute for Health Information Discharge Abstract Database (CIHI-DAD)<br><br>Ontario Health Insurance Plan (OHIP) fee code | ICD10: K550, K551, K558, K559, K2210, K2211, K2212, K2213, K223, K250, K251, K252, K253, K260, K261, K262, K263, K270, K271, K272, K273, K280, K281, K282, K283, K290, K631, K633<br><br>OHIPfee: S149, S157, S158, S160, S164, S165, S166, S167, S168, S169, S170, S171, S172, S173, S174, S177, S181, S182, S188, S191, S192, S193, S199, Z750 |
| Intestinal ischemia or thrombosis (ischemic colitis, acute mesenteric ischemia, mesenteric venous thrombosis)                             | CIHI-DAD                                                                                                                              | ICD10: K550, K551, K558, K559                                                                                                                                                                                                                                                                                                                    |
| Resection & ostomy                                                                                                                        | OHIP fee code                                                                                                                         | S149, S157, S158, S160, S164, S165, S166, S167, S168, S169, S170, S171, S172, S173, S174, S177, S181, S182, S188, S191, S192, S193, S199, Z750                                                                                                                                                                                                   |
| Gastrointestinal ulcer & perforation                                                                                                      | CIHI-DAD                                                                                                                              | ICD10: K2210, K2211, K2212, K2213, K223, K250, K251, K252, K253, K260, K261, K262, K263, K270, K271, K272, K273, K280, K281, K282, K283, K290, K631, K633                                                                                                                                                                                        |
| Adverse composite negative control outcome (cholecystitis, diverticulitis or appendicitis)                                                | CIHI-DAD                                                                                                                              | K810, K811, K818, K819, K350, K351, K352, K353, K358, K359, K570, K571, K572, K573, K574, K575, K578, K579                                                                                                                                                                                                                                       |

**eTable 3.** Ontario Drug Benefit Program Drug Identification Numbers Used to Define Exposure and Baseline Variables

| <b>Drug</b>                                    | <b>Drug Identification Number</b>                                                                                                                                                                                                                                                                                                                                                                                                                                                                                                                                                                                                                                                                                                                                                                                                                                                                                                                                                                                                                                                                                                                                                                                                                                                                                                                                                                                                                                                                                                                                                                                                                                                                                                                                                                                                                                                                                                                                                                                                                                                                                                                                                                                                                                                                                                                                                                                                                                                                                                                                                                                                                                                                                                                                                                                                                                                                                                                                                                                                                                                                                                                                                  |
|------------------------------------------------|------------------------------------------------------------------------------------------------------------------------------------------------------------------------------------------------------------------------------------------------------------------------------------------------------------------------------------------------------------------------------------------------------------------------------------------------------------------------------------------------------------------------------------------------------------------------------------------------------------------------------------------------------------------------------------------------------------------------------------------------------------------------------------------------------------------------------------------------------------------------------------------------------------------------------------------------------------------------------------------------------------------------------------------------------------------------------------------------------------------------------------------------------------------------------------------------------------------------------------------------------------------------------------------------------------------------------------------------------------------------------------------------------------------------------------------------------------------------------------------------------------------------------------------------------------------------------------------------------------------------------------------------------------------------------------------------------------------------------------------------------------------------------------------------------------------------------------------------------------------------------------------------------------------------------------------------------------------------------------------------------------------------------------------------------------------------------------------------------------------------------------------------------------------------------------------------------------------------------------------------------------------------------------------------------------------------------------------------------------------------------------------------------------------------------------------------------------------------------------------------------------------------------------------------------------------------------------------------------------------------------------------------------------------------------------------------------------------------------------------------------------------------------------------------------------------------------------------------------------------------------------------------------------------------------------------------------------------------------------------------------------------------------------------------------------------------------------------------------------------------------------------------------------------------------------|
| Sodium polystyrene sulfonate                   | 00769541, 01902776, 02026961                                                                                                                                                                                                                                                                                                                                                                                                                                                                                                                                                                                                                                                                                                                                                                                                                                                                                                                                                                                                                                                                                                                                                                                                                                                                                                                                                                                                                                                                                                                                                                                                                                                                                                                                                                                                                                                                                                                                                                                                                                                                                                                                                                                                                                                                                                                                                                                                                                                                                                                                                                                                                                                                                                                                                                                                                                                                                                                                                                                                                                                                                                                                                       |
| Angiotensin-converting enzyme (ACE) inhibitors | 00885835, 00885843, 00885851, 02273918, 02290332, 02290340, 00546283, 00546291, 00546305, 00695661, 00851639, 00851647, 00851655, 00851833, 00893595, 00893609, 00893617, 00893625, 01913824, 01913832, 01913840, 01913859, 01942964, 01942972, 01942980, 01942999, 02163551, 02163578, 02163586, 02163594, 02230203, 02230204, 02230205, 02230206, 02237861, 02237862, 02237863, 02242788, 02242789, 02242790, 02242791, 01911465, 01911473, 01911481, 02266350, 02266369, 02266377, 02280442, 02280450, 02280469, 02283778, 02283786, 02283794, 02285215, 02285223, 02291134, 02291142, 02291150, 02181479, 02284987, 02313731, 00670901, 00670928, 00708879, 00708887, 00851795, 02019884, 02019892, 02019906, 02020025, 02233005, 02233006, 02233007, 02291878, 02291886, 02291894, 02291908, 02299933, 02299941, 02299968, 02299976, 02299984, 02299992, 02300001, 02300028, 02300036, 02300044, 02300052, 02300060, 02300079, 02300087, 02300095, 02300109, 02300117, 02300125, 02300133, 02300141, 02300680, 02352230, 02352249, 02352257, 02352265, 02242733, 02242734, 02262401, 02262428, 02331004, 02331012, 01907107, 01907115, 02247802, 02247803, 02255944, 02255952, 02266008, 02266016, 02275252, 02275260, 02294524, 02294532, 02332566, 02332574, 00884375, 00884413, 02045737, 02103729, 02108194, 02261979, 02261987, 02297736, 02297744, 02301768, 02301776, 02302136, 02302144, 02302365, 02302373, 02408767, 02408783, 02237367, 02237368, 02237369, 02283131, 02283158, 02283166, 02283174, 02283182, 02342138, 02342146, 02342154, 02342162, 02342170, 02388332, 02388340, 02388359, 02388367, 02388375, 02246568, 02246569, 02321653, 00839329, 00839337, 00839388, 00839396, 00839418, 00839442, 02049333, 02049376, 02049384, 02217481, 02217503, 02217511, 02256797, 02256800, 02256819, 02271443, 02271451, 02271478, 02274833, 02274841, 02274868, 02285061, 02285088, 02285096, 02285118, 02285126, 02285134, 02289199, 02289202, 02289229, 02292203, 02292211, 02292238, 02294230, 02294249, 02294257, 02294591, 02299879, 02299887, 02299895, 02332167, 02332175, 02332183, 02361531, 02361558, 02361566, 02394472, 02394480, 02394499, 09853685, 09853960, 09854010, 09857272, 09857286, 09857287, 02123274, 02123282, 02246624, 01947664, 01947672, 01947680, 01947699, 02248499, 02248500, 02248501, 02248502, 02290987, 02290995, 02291002, 02291010, 02050943, 02050951, 02050978, 02050986, 02221829, 02221837, 02221845, 02221853, 02247917, 02247918, 02247919, 02247945, 02247946, 02247947, 02251515, 02251531, 02251574, 02251582, 02255316, 02255324, 02255332, 02283891, 02287692, 02287706, 02287714, 02287722, 02287927, 02287935, 02287943, 02291398, 02291401, 02291428, 02291436, 02295369, 02295482, 02295490, 02295504, 02295512, 02299372, 02301148, 02301156, 02301164, 02301172, 02310503, 02310511, 02310538, 02310546, 02331101, 02331128, 02331136, 02331144, 02332299, 02332302, 02332310, 02332329, 02374846, 02374854, 02374862, 02387387, 02387395, 02387409, 02387417, 02420457, 02420465, 02420473, 02420481, 02421305, 02421313, 02421321, 02438860, 02438879, 02438887, 02438895, 02231459, 02231460, 02239267 |
| Non-potassium sparing-diuretic                 | 00010413, 00010421, 00110108, 00291870, 00293881, 00298964, 00337447, 00337455, 00360279, 00360287, 00398365, 00398373, 00430994, 00431001, 00451789, 00451797, 00638625, 00638633, 00806145, 02049961, 02049988, 02248763, 02248764, 02302918, 02302926, 02348233, 02348241, 02397749, 02397757, 02397765, 99101026, 99101027, 00005568, 00005576, 00007560, 00007579, 00016500, 00016519, 00018392, 00018406, 00018848, 00018856, 00021474, 00021482, 00074365, 00074373, 00074381, 00074608, 00085200, 00092681, 00092703, 00112828, 00134341, 00140589, 00140597, 00140600,                                                                                                                                                                                                                                                                                                                                                                                                                                                                                                                                                                                                                                                                                                                                                                                                                                                                                                                                                                                                                                                                                                                                                                                                                                                                                                                                                                                                                                                                                                                                                                                                                                                                                                                                                                                                                                                                                                                                                                                                                                                                                                                                                                                                                                                                                                                                                                                                                                                                                                                                                                                                    |

|                                                                                                                                                                                                                                                                                                                                                                                                                                                                                                                                                                                                                                                                                                                                                                                                                                                                                                                                                                                                                                                                                                                                                                                                                                                                                                                                                                                                                                                                                                                                                                                                                                                                                                                                                                                                                                                                                                                                                                                                                                                                                                                                                                                                                                                                                                                                                                                                                                                                                                                                                                                                                                                                                                                                                                                                                                                                                                                                                                                                                                                                                                                                                                                                                                                                                                                                                                                                                                                                                                                                                                                                                                                                                                                                                                                                                                                                                                                                                                                                                                                                                        |
|----------------------------------------------------------------------------------------------------------------------------------------------------------------------------------------------------------------------------------------------------------------------------------------------------------------------------------------------------------------------------------------------------------------------------------------------------------------------------------------------------------------------------------------------------------------------------------------------------------------------------------------------------------------------------------------------------------------------------------------------------------------------------------------------------------------------------------------------------------------------------------------------------------------------------------------------------------------------------------------------------------------------------------------------------------------------------------------------------------------------------------------------------------------------------------------------------------------------------------------------------------------------------------------------------------------------------------------------------------------------------------------------------------------------------------------------------------------------------------------------------------------------------------------------------------------------------------------------------------------------------------------------------------------------------------------------------------------------------------------------------------------------------------------------------------------------------------------------------------------------------------------------------------------------------------------------------------------------------------------------------------------------------------------------------------------------------------------------------------------------------------------------------------------------------------------------------------------------------------------------------------------------------------------------------------------------------------------------------------------------------------------------------------------------------------------------------------------------------------------------------------------------------------------------------------------------------------------------------------------------------------------------------------------------------------------------------------------------------------------------------------------------------------------------------------------------------------------------------------------------------------------------------------------------------------------------------------------------------------------------------------------------------------------------------------------------------------------------------------------------------------------------------------------------------------------------------------------------------------------------------------------------------------------------------------------------------------------------------------------------------------------------------------------------------------------------------------------------------------------------------------------------------------------------------------------------------------------------------------------------------------------------------------------------------------------------------------------------------------------------------------------------------------------------------------------------------------------------------------------------------------------------------------------------------------------------------------------------------------------------------------------------------------------------------------------------------------------|
| <p>00140619, 00140627, 00156604, 00173541, 00178365, 00180408, 00181528, 00209813, 00209821, 00210110, 00232750, 00263893, 00263907, 00301523, 00307947, 00309125, 00312800, 00326844, 00341975, 00354317, 00363634, 00363642, 00403482, 00403490, 00405620, 00431060, 00431079, 00436968, 00436976, 00441708, 00441716, 00441775, 00465313, 00465321, 00487813, 00491543, 00502529, 00509353, 00519367, 00520802, 00532088, 00532657, 00568627, 00568635, 00578444, 00584967, 00584975, 00594377, 00613231, 00657182, 00657298, 00770589, 00770597, 00775313, 00775321, 00784400, 00808369, 00808377, 00865532, 00870943, 00882860, 00884375, 00884383, 00884413, 00884421, 00885746, 00886106, 00919547, 01910191, 01919547, 01937219, 02042282, 02042290, 02045729, 02045737, 02083450, 02083493, 02103729, 02108194, 02162865, 02162873, 02162881, 02170639, 02170647, 02174596, 02181479, 02230047, 02231254, 02237367, 02237368, 02237369, 02238638, 02240846, 02241007, 02241818, 02241819, 02241900, 02241901, 02242092, 02242826, 02244021, 02244344, 02246955, 02247170, 02247171, 02247386, 02247387, 02248134, 02248135, 02250659, 02250667, 02253631, 02257378, 02261979, 02261987, 02261995, 02274086, 02280213, 02282879, 02282887, 02283131, 02283158, 02283166, 02283174, 02283182, 02284987, 02297736, 02297744, 02297752, 02297841, 02300222, 02300230, 02301768, 02301776, 02301784, 02302136, 02302144, 02302152, 02302365, 02302373, 02302381, 02308908, 02308916, 02313375, 02313383, 02313731, 02316013, 02316021, 02316048, 02318709, 02319616, 02319624, 02319632, 02327856, 02327902, 02328518, 02328526, 02328534, 02330288, 02330482, 02330490, 02330504, 02330512, 02330520, 02330539, 02332728, 02332736, 02332744, 02332752, 02332922, 02332957, 02335824, 02335972, 02335980, 02335999, 02336766, 02336774, 02336782, 02337428, 02337436, 02337444, 02341786, 02341794, 02341808, 02342138, 02342146, 02342154, 02342162, 02342170, 02352923, 02352931, 02354004, 02354012, 02354020, 02354039, 02354411, 02354438, 02354446, 02356694, 02356708, 02356716, 02356724, 02356732, 02356996, 02357003, 02357011, 02357038, 02357046, 02357399, 02357402, 02357410, 02358263, 02360594, 02360608, 02360954, 02361108, 02361116, 02361124, 02361132, 02361140, 02361167, 02362449, 02362880, 02362899, 02362902, 02362945, 02362953, 02362961, 02363003, 02363011, 02363038, 02363208, 02363216, 02363224, 02363879, 02363968, 02363976, 02365162, 02365170, 02365189, 02367009, 02367017, 02367025, 02367033, 02367041, 02367068, 02367076, 02367084, 02367092, 02367106, 02367637, 02367653, 02367769, 02367777, 02367785, 02367866, 02368722, 02368935, 02368943, 02368951, 02371235, 02371243, 02371251, 02371265, 02372223, 02372231, 02372266, 02372886, 02372894, 02372908, 02373343, 02373351, 02373378, 02373564, 02373572, 02373734, 02373742, 02373750, 02373769, 02373777, 02374897, 02375656, 02375664, 02375672, 02375680, 02375699, 02376873, 02376881, 02376903, 02377144, 02377152, 02378078, 02378086, 02378094, 02379252, 02382547, 02382555, 02382563, 02382571, 02382598, 02384736, 02384744, 02384752, 02384760, 02384779, 02385317, 02385325, 02385333, 02387646, 02387654, 02387662, 02388251, 02388278, 02388286, 02388332, 02388340, 02388359, 02388367, 02388375, 02388650, 02388960, 02388979, 02388987, 02389657, 02389665, 02389673, 02390302, 02390310, 02391295, 02392224, 02392232, 02392240, 02392275, 02392992, 02393018, 02393026, 02393263, 02393271, 02393557, 02393565, 02394391, 02394405, 02394413, 02394804, 02394812, 02395126, 02395134, 02395355, 02395363, 02395525, 02395533, 02395541, 02395568, 02395576, 02396238, 02396246, 02396572, 02396580, 02401665, 02401673, 02404001, 02404028, 02404036, 02408112, 02408120, 02408139, 02408147, 02408155, 02408244, 02408252, 02408767, 02408775, 02408783, 02412640, 02412659, 02412667, 02412675, 02415887, 02415895, 02415909, 02418223, 02418231, 02418258, 02419114, 02419122, 02420023, 02420031, 02420732, 02420740, 02421038, 02421046, 02421054,</p> |
|----------------------------------------------------------------------------------------------------------------------------------------------------------------------------------------------------------------------------------------------------------------------------------------------------------------------------------------------------------------------------------------------------------------------------------------------------------------------------------------------------------------------------------------------------------------------------------------------------------------------------------------------------------------------------------------------------------------------------------------------------------------------------------------------------------------------------------------------------------------------------------------------------------------------------------------------------------------------------------------------------------------------------------------------------------------------------------------------------------------------------------------------------------------------------------------------------------------------------------------------------------------------------------------------------------------------------------------------------------------------------------------------------------------------------------------------------------------------------------------------------------------------------------------------------------------------------------------------------------------------------------------------------------------------------------------------------------------------------------------------------------------------------------------------------------------------------------------------------------------------------------------------------------------------------------------------------------------------------------------------------------------------------------------------------------------------------------------------------------------------------------------------------------------------------------------------------------------------------------------------------------------------------------------------------------------------------------------------------------------------------------------------------------------------------------------------------------------------------------------------------------------------------------------------------------------------------------------------------------------------------------------------------------------------------------------------------------------------------------------------------------------------------------------------------------------------------------------------------------------------------------------------------------------------------------------------------------------------------------------------------------------------------------------------------------------------------------------------------------------------------------------------------------------------------------------------------------------------------------------------------------------------------------------------------------------------------------------------------------------------------------------------------------------------------------------------------------------------------------------------------------------------------------------------------------------------------------------------------------------------------------------------------------------------------------------------------------------------------------------------------------------------------------------------------------------------------------------------------------------------------------------------------------------------------------------------------------------------------------------------------------------------------------------------------------------------------------------|

|                            |                                                                                                                                                                                                                                                                                                                                                                                                                                                                                                                                                                                                                                                                                                                                                                                                                                                                                                                                                                                                                                                                                                                                                                                                                                                                                                                                                                                                                                                                                                                                                                                                                                                                                                                                                                                                                                                                                                                                                                                      |
|----------------------------|--------------------------------------------------------------------------------------------------------------------------------------------------------------------------------------------------------------------------------------------------------------------------------------------------------------------------------------------------------------------------------------------------------------------------------------------------------------------------------------------------------------------------------------------------------------------------------------------------------------------------------------------------------------------------------------------------------------------------------------------------------------------------------------------------------------------------------------------------------------------------------------------------------------------------------------------------------------------------------------------------------------------------------------------------------------------------------------------------------------------------------------------------------------------------------------------------------------------------------------------------------------------------------------------------------------------------------------------------------------------------------------------------------------------------------------------------------------------------------------------------------------------------------------------------------------------------------------------------------------------------------------------------------------------------------------------------------------------------------------------------------------------------------------------------------------------------------------------------------------------------------------------------------------------------------------------------------------------------------------|
|                            | 02423642, 02423650, 02423669, 02425947, 02426196, 02426218, 02427036, 02427044, 02427052, 02427060, 02427079, 02427648, 02427656, 02427664, 02428539, 02428547, 02433214, 02433222, 02434067, 02434075, 02443112, 02443120, 02443139, 02447878, 02447886, 02447894, 02453606, 02453614, 02453622, 02456389, 02456397, 02462036, 02462044, 02462052, 02463849, 02463857, 02463865, 09857732, 22123245, 22373680, 49021474, 66999106, 92357399, 99100377, 99100460, 99100989, 99101047, 00564966, 02049341, 02153483, 02179709, 02188910, 02223597, 02223678, 02227339, 02229762, 02230030, 02230669, 02231184, 02237255, 02239619, 02239620, 02239913, 02239917, 02240067, 02240349, 02240350, 02241018, 02242125, 02245246, 02246568, 02246569, 02247229, 02247245, 02286963, 02286971, 02312530, 02312549, 02318555, 02318563, 02321653, 02337118, 02341166, 02341182, 02357321, 02362015, 02364611, 02364638, 02365324, 02373904, 02373912, 02445824, 02445832, 90800586, 00301663, 00301671, 00301698, 00888400, 00888419, 00888427, 00903780, 00728276, 00728284, 02176076, 00012548, 00012580, 00217743, 00289590, 00332275, 00337730, 00337749, 00344079, 00353612, 00362166, 00366854, 00380016, 00380024, 00387614, 00392286, 00396249, 00396788, 00397687, 00397792, 00401633, 00404489, 00431052, 00432342, 00489131, 00496723, 00502421, 00502510, 00527033, 00565040, 00667080, 00707570, 00765953, 00888176, 00896292, 01900943, 01987550, 01987585, 01987615, 01987739, 01987771, 01987798, 01988832, 01996436, 02070936, 02224690, 02224704, 02224712, 02224720, 02224739, 02224747, 02224755, 02224763, 02239224, 02239225, 02247371, 02247372, 02247493, 02247494, 02248124, 02248125, 02294389, 02294397, 02344238, 02344246, 02344254, 02348292, 02348306, 02348314, 02351420, 02351439, 02351447, 02360365, 02360446, 02364573, 02364581, 02364603, 02382539, 02384094, 02461404, 09857208, 09857724, 09857725, 80337730, 00016497, 00268313, 02258528, 99100191 |
| Potassium-sparing diuretic | 02323052, 02323060, 00027138, 00181528, 00299715, 00441775, 00532657, 00865532, 01910191, 01919547, 01919563, 01919571, 00028606, 00180408, 00285455, 00594377, 00613215, 00613223, 00613231, 00657182, 00487805, 00487813, 00784400, 00886106, 01937219, 02174596, 02249510, 02257378                                                                                                                                                                                                                                                                                                                                                                                                                                                                                                                                                                                                                                                                                                                                                                                                                                                                                                                                                                                                                                                                                                                                                                                                                                                                                                                                                                                                                                                                                                                                                                                                                                                                                               |
| Beta blocker               | 00002658, 00002666, 00313602, 00353914, 00353922, 00397423, 00397431, 00402540, 00402567, 00402575, 00402583, 00402605, 00402753, 00402761, 00402788, 00417270, 00417289, 00443174, 00451193, 00451207, 00456578, 00463256, 00465313, 00465321, 00483923, 00486833, 00489859, 00495611, 00496480, 00496499, 00496502, 00497827, 00504335, 00511668, 00520683, 00523372, 00523380, 00523399, 00523402, 00534560, 00534579, 00534587, 00549657, 00566950, 00568627, 00568635, 00582255, 00582263, 00582271, 00587931, 00603643, 00603651, 00607126, 00618632, 00618640, 00637661, 00638625, 00638633, 00648035, 00648043, 00658855, 00663719, 00695645, 00695653, 00695688, 00726559, 00726567, 00740675, 00749354, 00751170, 00751286, 00755826, 00755834, 00755842, 00755850, 00755869, 00755877, 00755885, 00755893, 00771333, 00771341, 00773689, 00773697, 00782467, 00782475, 00782505, 00818593, 00818607, 00818615, 00842648, 00842656, 00851663, 00851671, 00851698, 00865605, 00865613, 00869007, 00869015, 00869023, 00886009, 00886114, 00886122, 00886130, 00886149, 00893773, 00893781, 00897272, 01908448, 01910140, 01910159, 01910167, 01912054, 01912062, 01924915, 01924923, 01924931, 01926543, 01926551, 01926578, 01947796, 01947818, 01947826, 02031159, 02031167, 02036290, 02036436, 02036444, 02039532, 02039540, 02042177, 02042193, 02042207, 02042215, 02042231, 02042258, 02042266, 02042274, 02042282, 02042290, 02044609, 02044617, 02044625, 02048515, 02048523, 02049961, 02049988, 02057808, 02057816, 02057824, 02083345, 02083353, 02084228, 02084236, 02091518, 02106272, 02106280, 02123290, 02123304, 02126753, 02126761, 02145413, 02145421, 02146894, 02147432, 02147602, 02147610, 02147629, 02163772,                                                                                                                                                                                                                                      |

|                                              |                                                                                                                                                                                                                                                                                                                                                                                                                                                                                                                                                                                                                                                                                                                                                                                                                                                                                                                                                                                                                                                                                                                                                                                                                                                                                                                                                                                                                                                                                                                                                                                                                                                                                                                                                                                                                                                                                                                                                                                                                                                                                                                                                                                                                                                                  |
|----------------------------------------------|------------------------------------------------------------------------------------------------------------------------------------------------------------------------------------------------------------------------------------------------------------------------------------------------------------------------------------------------------------------------------------------------------------------------------------------------------------------------------------------------------------------------------------------------------------------------------------------------------------------------------------------------------------------------------------------------------------------------------------------------------------------------------------------------------------------------------------------------------------------------------------------------------------------------------------------------------------------------------------------------------------------------------------------------------------------------------------------------------------------------------------------------------------------------------------------------------------------------------------------------------------------------------------------------------------------------------------------------------------------------------------------------------------------------------------------------------------------------------------------------------------------------------------------------------------------------------------------------------------------------------------------------------------------------------------------------------------------------------------------------------------------------------------------------------------------------------------------------------------------------------------------------------------------------------------------------------------------------------------------------------------------------------------------------------------------------------------------------------------------------------------------------------------------------------------------------------------------------------------------------------------------|
|                                              | <p>02165546, 02165554, 02165562, 02166712, 02166720, 02167794, 02170841, 02171791, 02171805, 02171880, 02171899, 02174545, 02174553, 02204517, 02204525, 02204533, 02210428, 02220679, 02220687, 02229650, 02229651, 02229652, 02229653, 02229778, 02229779, 02229780, 02230076, 02230077, 02230448, 02230449, 02230650, 02230803, 02230804, 02231181, 02231182, 02231536, 02231537, 02231539, 02231714, 02231715, 02231731, 02231733, 02234013, 02237600, 02237601, 02237721, 02237722, 02237723, 02237885, 02237886, 02237887, 02237991, 02238316, 02238326, 02238327, 02238415, 02240249, 02240808, 02240809, 02240810, 02240811, 02241148, 02241149, 02241574, 02241575, 02241715, 02241716, 02242275, 02242276, 02243538, 02243539, 02245914, 02245915, 02245916, 02245917, 02246010, 02246529, 02246530, 02246531, 02246532, 02247439, 02247440, 02247875, 02247876, 02247933, 02247934, 02247935, 02247936, 02248347, 02248752, 02248753, 02248755, 02248763, 02248764, 02252309, 02252317, 02252325, 02252333, 02253518, 02253526, 02255545, 02255553, 02256134, 02256177, 02257599, 02257602, 02257610, 02257858, 02261782, 02261790, 02261804, 02267470, 02267489, 02267985, 02267993, 02268027, 02268035, 02268043, 02268051, 02270625, 02270633, 02278251, 02285169, 02285177, 02286246, 02286254, 02286262, 02290812, 02302632, 02302640, 02302918, 02302926, 02303396, 02303418, 02331624, 02347512, 02347520, 02347555, 02347571, 02354187, 02354195, 02356821, 02356848, 02364913, 02364948, 02367564, 02367572, 02368021, 02368048, 02368625, 02368641, 02368668, 02368897, 02368900, 02368919, 02368927, 02371987, 02371995, 02384418, 02384426, 02418495, 02418509, 02418517, 02418525, 09851453, 09857298, 09857333, 09857512, 09857513</p>                                                                                                                                                                                                                                                                                                                                                                                                                                                                                                  |
| <p>Angiotensin II receptor blocker (ARB)</p> | <p>02371022, 02371030, 02371049, 02371057, 02313049, 02339080, 02351218, 02361418, 02379104, 02379562, 02393573, 02239090, 02239091, 02239092, 02311658, 02326957, 02326965, 02326973, 02365340, 02365359, 02365367, 02366312, 02366320, 02366339, 02376520, 02376539, 02376547, 02376555, 02379120, 02379139, 02379147, 02379155, 02379260, 02379279, 02379287, 02379295, 02380684, 02380692, 02380706, 02380714, 02386496, 02386518, 02386526, 02386534, 02391171, 02391198, 02391201, 02391228, 02392267, 02399105, 02417340, 02244021, 02327902, 02332922, 02332957, 02367866, 02374897, 02388650, 02391295, 02395126, 02395134, 02395541, 02395568, 02395576, 02420732, 02420740, 02421038, 02421046, 02421054, 02240431, 02240432, 02243942, 02253631, 02241818, 02241819, 02280213, 02316013, 02316021, 02316048, 02328518, 02328526, 02328534, 02330512, 02330520, 02330539, 02337428, 02337436, 02337444, 02357399, 02357402, 02357410, 02363208, 02363216, 02363224, 02387646, 02387654, 02387662, 02392992, 02393018, 02393026, 02418223, 02418231, 02418258, 02230047, 02241007, 02297841, 02313375, 02313383, 02358263, 02362449, 02371235, 02371243, 02371251, 02377144, 02377152, 02378078, 02378086, 02378094, 02388251, 02388278, 02388286, 02389657, 02389665, 02389673, 02392224, 02392232, 02392240, 02408244, 02408252, 02423642, 02423650, 02423669, 02319616, 02319624, 02319632, 02408775, 02244344, 02318709, 02330288, 02373564, 02373572, 02379252, 02393263, 02393271, 02393557, 02393565, 02401665, 02401673, 02419114, 02419122, 02420023, 02420031, 02433214, 02433222, 02241900, 02241901, 02246955, 02308908, 02308916, 02356694, 02356708, 02356716, 02356724, 02356732, 02356996, 02357003, 02357011, 02357038, 02357046, 02373734, 02373742, 02373750, 02373769, 02373777, 02382547, 02382555, 02382563, 02382571, 02382598, 02408112, 02408120, 02408139, 02408147, 02408155, 02237923, 02237924, 02237925, 02315971, 02315998, 02316005, 02316390, 02316404, 02316412, 02317060, 02317079, 02317087, 02328070, 02328089, 02328100, 02328461, 02328488, 02328496, 02347296, 02347318, 02347326, 02386968, 02386976, 02386984, 02406098, 02406101, 02406128, 02406810, 02406829, 02406837, 02418193, 02418207, 02418215,</p> |

|                                       |                                                                                                                                                                                                                                                                                                                                                                                                                                                                                                                                                                                                                                                                                                                                                                                                                                                                                                                                                                                                                                                                                                                                                                                                                                                                                                                                                                                                                                                                                                                                                                                                                                                                                                                                                                                                                                                                                                                                                                                                                                                                                                                                                                                                                                                                                                                                                                                                                                                                                                                                                                                                                                                                                                                                                                                                                                                                                                                 |
|---------------------------------------|-----------------------------------------------------------------------------------------------------------------------------------------------------------------------------------------------------------------------------------------------------------------------------------------------------------------------------------------------------------------------------------------------------------------------------------------------------------------------------------------------------------------------------------------------------------------------------------------------------------------------------------------------------------------------------------------------------------------------------------------------------------------------------------------------------------------------------------------------------------------------------------------------------------------------------------------------------------------------------------------------------------------------------------------------------------------------------------------------------------------------------------------------------------------------------------------------------------------------------------------------------------------------------------------------------------------------------------------------------------------------------------------------------------------------------------------------------------------------------------------------------------------------------------------------------------------------------------------------------------------------------------------------------------------------------------------------------------------------------------------------------------------------------------------------------------------------------------------------------------------------------------------------------------------------------------------------------------------------------------------------------------------------------------------------------------------------------------------------------------------------------------------------------------------------------------------------------------------------------------------------------------------------------------------------------------------------------------------------------------------------------------------------------------------------------------------------------------------------------------------------------------------------------------------------------------------------------------------------------------------------------------------------------------------------------------------------------------------------------------------------------------------------------------------------------------------------------------------------------------------------------------------------------------------|
|                                       | 02422980, 02422999, 02423006, 02427087, 02427095, 02427109, 02182815, 02182874, 02182882, 02309750, 02309769, 02309777, 02313332, 02313340, 02313359, 02353504, 02353512, 02354829, 02354837, 02354845, 02357968, 02357976, 02368277, 02368285, 02368293, 02379058, 02380838, 02398834, 02398842, 02398850, 02403323, 02403331, 02403358, 02404451, 02404478, 02404486, 02405733, 02405741, 02405768, 02422468, 02422484, 02424967, 02424975, 02424983, 02426595, 02426609, 02426617, 02318660, 02318679, 02240769, 02240770, 02320177, 02320185, 02375958, 02375966, 02376717, 02376725, 02391236, 02391244, 02393247, 02393255, 02407485, 02407493, 02420082, 02420090, 02432897, 02432900, 02434164, 02236808, 02236809, 02244781, 02244782, 02289504, 02313006, 02313014, 02337495, 02337509, 02337517, 02344564, 02356651, 02356678, 02356686, 02356759, 02356767, 02356775, 02363100, 02363119, 02371529, 02371537, 02371545, 02383535, 02383543, 02383551, 02414228, 02414236, 02414244                                                                                                                                                                                                                                                                                                                                                                                                                                                                                                                                                                                                                                                                                                                                                                                                                                                                                                                                                                                                                                                                                                                                                                                                                                                                                                                                                                                                                                                                                                                                                                                                                                                                                                                                                                                                                                                                                                                  |
| Aldosterone receptor antagonist       | 00028606, 00180408, 00285455, 00594377, 00613215, 00613223, 00613231, 00657182, 02323052, 02323060                                                                                                                                                                                                                                                                                                                                                                                                                                                                                                                                                                                                                                                                                                                                                                                                                                                                                                                                                                                                                                                                                                                                                                                                                                                                                                                                                                                                                                                                                                                                                                                                                                                                                                                                                                                                                                                                                                                                                                                                                                                                                                                                                                                                                                                                                                                                                                                                                                                                                                                                                                                                                                                                                                                                                                                                              |
| Non-steroidal anti-inflammatory agent | 00010332, 00010340, 00036145, 00040851, 00092754, 00216666, 00229296, 00315117, 00315133, 00377961, 00419508, 00451738, 00451746, 00785547, 01905392, 02046253, 02150352, 02208156, 02237726, 02242281, 09857146, 09857147, 00226327, 00275328, 00176192, 00176206, 00608203, 00095508, 00095516, 00108103, 00604496, 00604518, 00219843, 02238645, 00406104, 00406112, 02266121, 02239941, 02239942, 02288915, 02288923, 02291975, 02291983, 02321246, 02321254, 02355442, 02355450, 02399881, 02412373, 02412381, 02412497, 02412500, 02418932, 02418940, 02420058, 02420066, 02420155, 02420163, 02423278, 02424533, 02424541, 02435632, 02435640, 02442639, 02442647, 02445670, 02445689, 02048698, 02158582, 00990296, 00514004, 00514012, 00590827, 00632724, 00632732, 00782459, 00808539, 00808547, 00839175, 00839183, 00886017, 00886025, 01910175, 01910183, 01940414, 02091194, 02162814, 02174677, 02174685, 02228203, 02228211, 02231502, 02231503, 02231504, 02231505, 02231506, 02231508, 02237786, 02237787, 02241224, 02241225, 02247265, 02261901, 02261928, 02261936, 02261944, 02261960, 02302616, 02302624, 02441020, 02454807, 01917056, 02229837, 02341689, 02341697, 02397145, 02397153, 00576131, 00587699, 02039486, 02039494, 02048493, 02048507, 02142023, 02142031, 02232318, 00328642, 00345504, 00638668, 00754153, 01902717, 01902725, 02017628, 02017636, 02244680, 02244681, 00593346, 00593354, 00600792, 00647942, 00675199, 00675202, 01912038, 01912046, 02020661, 02020688, 02100509, 02100517, 02223066, 02223074, 00766046, 00990291, 00252409, 00327794, 00364142, 00441643, 00441651, 00443182, 00443190, 00443204, 00484911, 00506052, 00585114, 00606197, 00606200, 00606219, 00606227, 00629324, 00629332, 00629340, 00629359, 00016039, 00016047, 00016233, 00337420, 00337439, 00463248, 00594458, 00594466, 00597805, 00611158, 00611166, 00865850, 00865869, 01934139, 01934147, 02143364, 02143372, 02146932, 02146940, 02176130, 02176149, 02204541, 02204568, 02231799, 02231800, 00336440, 00499544, 00566888, 00663735, 00761664, 00761672, 00761680, 00761699, 00790427, 00790435, 00817201, 00842664, 01913050, 01913069, 01926365, 01926373, 01926381, 01926403, 01926411, 01981528, 01981536, 02015951, 02031175, 02150808, 02150816, 02150824, 02156083, 02165481, 02172577, 00864048, 00882917, 01968300, 02162644, 02162652, 02162660, 02230201, 02245821, 02247461, 02369362, 00155225, 02229452, 02229569, 02231208, 02242785, 02242786, 02247889, 02248031, 02248267, 02248268, 02248607, 02248608, 02248973, 02248974, 02250012, 02250020, 02255987, 02255995, 02258315, 02258323, 02353148, 02353156, 02390884, 02390892, 02083531, 02083558, 02238639, 02240867, 02244563, 00299413, 00335193, 00522651, 00522678, 00525537, 00531022, 00565350, 00565369, 00583367, 00587923, 00589861, 00592277, 00600806, 00615307, 00615315, 00615323, |

|                              |                                                                                                                                                                                                                                                                                                                                                                                                                                                                                                                                                                                                                                                                                                                                                                                                                                                                                  |
|------------------------------|----------------------------------------------------------------------------------------------------------------------------------------------------------------------------------------------------------------------------------------------------------------------------------------------------------------------------------------------------------------------------------------------------------------------------------------------------------------------------------------------------------------------------------------------------------------------------------------------------------------------------------------------------------------------------------------------------------------------------------------------------------------------------------------------------------------------------------------------------------------------------------|
|                              | 00615331, 00627097, 00756814, 00788767, 00865621, 00865648, 00865656, 00865664, 02017237, 02162415, 02162423, 02162431, 02162458, 02162474, 02162482, 02162490, 02177072, 02229690, 02230477, 02231327, 00491772, 02027860, 00010502, 00021660, 00093041, 00258377, 00312789, 00525596, 00525618, 00632708, 00632716, 00642886, 00642894, 00695696, 00695718, 00836230, 00836249, 00865761, 00865788, 02139952, 02139960, 02144212, 02144220, 02154420, 02154463, 02171813, 02171821, 02230066, 02230067, 02238028, 02241107, 02241108, 02241109, 02027917, 00432369, 00456888, 00745588, 00745596, 00778354, 00778362, 02042576, 02042584, 00884367, 00589926, 00589934, 00893714, 01924613, 01924621, 01989774, 01989782, 01989790, 02136112, 02136120, 02179679, 02179687, 02221950, 02221969, 02230827, 02230828, 00364126, 00484938, 00632740, 02076233, 02246621, 02246622 |
| Low molecular weight heparin | 02012472, 02132621, 02132648, 02132656, 02132664, 02167840, 02229515, 02229755, 02231171, 02231478, 02236564, 02236883, 02236913, 02240114, 02242692, 02352648, 02352656, 02352664, 02352672, 02352680, 02358158, 02358166, 02358174, 02358182, 02377454, 02378426, 02378434, 02378442, 02378469, 02429462, 02429470, 02429489, 02430789, 09852468, 09852476, 09852484, 09853790, 09853820, 09853880, 09853898, 09853901, 09853910, 09853928, 09853936, 09853944, 09853952, 09853979, 09853987, 09854100, 09854118, 09857137, 09857205, 09857367                                                                                                                                                                                                                                                                                                                                 |



**eTable 4.** Covariates Included in High Dimensional Propensity Score (HDPS)

| Type of Code         | Exact Code Label     | Frequency | Rank | Bias Multiplier | Code description                                                                                                                                          |
|----------------------|----------------------|-----------|------|-----------------|-----------------------------------------------------------------------------------------------------------------------------------------------------------|
| feecode_ohip_fee     | L251                 | 166674    | 1    | 1.7157          | LAB.MED.-BIOCHEM.-UREA NITROGEN (B.U.N.)                                                                                                                  |
| feecode_ohip_fee     | L700                 | 1254713   | 2    | 1.6668          | LAB. MED.-PATIENT DOCUMENTATION & SPECIMEN COLLECTION FEE                                                                                                 |
| feecode_ohip_fee     | L251                 | 166674    | 3    | 1.6631          | LAB.MED.-BIOCHEM.-UREA NITROGEN (B.U.N.)                                                                                                                  |
| feecode_ohip_fee     | L053                 | 744496    | 4    | 1.6548          | LAB. MED.-BIOCHEM.-CHLORIDE                                                                                                                               |
| feecode_ohip_fee     | L226                 | 899632    | 5    | 1.6374          | LAB. MED.-BIOCHEM.-SODIUM                                                                                                                                 |
| feecode_ohip_fee     | L204                 | 936324    | 6    | 1.6299          | LAB. MED.-BIOCHEM.-POTASSIUM                                                                                                                              |
| feecode_ohip_fee     | X091                 | 420294    | 7    | 1.6113          | DIAGNOSTIC RADIOLOGY CHEST 2 VIEWS                                                                                                                        |
| dxcode_ohip_dx       | 428                  | 70502     | 8    | 1.5937          | Congestive heart failure                                                                                                                                  |
| dxcode_ohip_dx       | 584                  | 14702     | 9    | 1.5768          | Acute renal failure                                                                                                                                       |
| feecode_ohip_fee     | X090                 | 99519     | 10   | 1.5432          | DIAGNOSTIC RADIOLOGY CHEST SINGLE VIEW                                                                                                                    |
| feecode_ohip_fee     | C124                 | 108303    | 11   | 1.5421          | DAY OF DISCHARGE VISIT - MOST RESPONSIBLE PHYS                                                                                                            |
| dxcode_ohip_dx       | 428                  | 70502     | 12   | 1.5355          | Congestive heart failure                                                                                                                                  |
| feecode_ohip_fee     | C002                 | 71601     | 14   | 1.5314          | SUBSEQ.VISITS-TO 5WKS-F.P./G.P.-HOSP.                                                                                                                     |
| dxcode_ohip_dx       | 437                  | 7846      | 14   | 1.5314          | Chronic arteriosclerotic cerebrovascular disease, hypertensive encephalopathy                                                                             |
| incode1_dad_incode   | 1VG53LAPNN           | 1042      | 14   | 1.5314          | Implantation of internal device, knee joint with synthetic material (e.g. bone paste, cement, Dynagraft, Osteoset) using dual component prosthetic device |
| dx10code1_dad_icd10  | H409                 | 1490      | 17   | 1.5153          | Glaucoma, unspecified                                                                                                                                     |
| incode1_dad_incode   | 1PM59BAAG            | 301       | 17   | 1.5153          | Destruction, bladder endoscopic per orifice approach using laser                                                                                          |
| incode1_nacrs_incode | 3GY10VA              | 138556    | 17   | 1.5153          | Xray, thoracic cavity NEC without contrast (with or without fluoroscopy)                                                                                  |
| subclnam_odb_hdps    | IRON PREPARATIONS    | 95479     | 20   | 1.4940          | IRON PREPARATIONS                                                                                                                                         |
| incode1_dad_incode   | 1NQ87BAFA            | 696       | 20   | 1.4940          | Excision partial, rectum endoscopic per orifice approach encircage device                                                                                 |
| incode1_nacrs_incode | 1ZZ35HAK0            | 375       | 20   | 1.4940          | Pharmacotherapy, total body general antiinfective agents percutaneous approach [intramuscular, intravenous, subcutaneous, intradermal] antiinfective NOS  |
| feecode_ohip_fee     | L067                 | 1105505   | 22   | 1.4678          | LAB. MED.-BIOCHEM-CREATININE (NOT WITH L068).                                                                                                             |
| subclnam_odb_hdps    | ANTIPSYCHOTIC AGENTS | 66382     | 25   | 1.4585          | ANTIPSYCHOTIC AGENTS                                                                                                                                      |
| feecode_ohip_fee     | A135                 | 217035    | 25   | 1.4585          | CONSULT.-INTERNAL MED.                                                                                                                                    |

|                      |                        |         |    |        |                                                                                                                                                           |
|----------------------|------------------------|---------|----|--------|-----------------------------------------------------------------------------------------------------------------------------------------------------------|
| dx10code1_dad_iced10 | C541                   | 617     | 25 | 1.4585 | Malignant neoplasm of endometrium                                                                                                                         |
| incode1_dad_incode   | 1FU89NZ                | 479     | 25 | 1.4585 | Excision total, thyroid gland open approach [e.g. neck incision] using device NEC                                                                         |
| incode1_nacrs_incode | 1TV73JA                | 840     | 25 | 1.4585 | Reduction, radius and ulna using closed (external) approach                                                                                               |
| feecode_ohip_fee     | X091                   | 420294  | 28 | 1.4533 | DIAGNOSTIC RADIOLOGY CHEST 2 VIEWS                                                                                                                        |
| feecode_ohip_fee     | L393                   | 1055280 | 29 | 1.4465 | LAB.MED-HEMATOLOGY-COMplete BLOOD COUNT                                                                                                                   |
| feecode_ohip_fee     | L800                   | 41796   | 30 | 1.4452 | LAB.MED.-ANAT PATH,HIST,CYTO- BLOOD FILM INTERPRETATION                                                                                                   |
| feecode_ohip_fee     | E083                   | 83542   | 31 | 1.4302 | Subsequent visit by the MRP, to subsequent visit, C122, C123, C124, C142, C143, C882 or C982                                                              |
| dxcode_ohip_dx       | 584                    | 14702   | 32 | 1.4264 | Acute renal failure                                                                                                                                       |
| dxcode_ohip_dx       | 428                    | 70502   | 33 | 1.4224 | Congestive heart failure                                                                                                                                  |
| subclnam_odb_hdps    | IRON PREPARATION S     | 95479   | 35 | 1.4184 | IRON PREPARATIONS                                                                                                                                         |
| incode1_dad_incode   | 1NQ87BAFA              | 696     | 35 | 1.4184 | Excision partial, rectum endoscopic per orifice approach encircilage device                                                                               |
| incode1_nacrs_incode | 1ZZ35HAK0              | 375     | 35 | 1.4184 | Pharmacotherapy, total body general antiinfective agents percutaneous approach [intramuscular, intravenous, subcutaneous, intradermal] antiinfective NOS  |
| feecode_ohip_fee     | E083                   | 83542   | 37 | 1.3942 | Subsequent visit by the MRP, to subsequent visit, C122, C123, C124, C142, C143, C882 or C982                                                              |
| feecode_ohip_fee     | C002                   | 71601   | 39 | 1.3929 | SUBSEQ.VISITS-TO 5WKS-F.P./G.P.-HOSP.                                                                                                                     |
| dxcode_ohip_dx       | 437                    | 7846    | 39 | 1.3929 | Chronic arteriosclerotic cerebrovascular disease, hypertensive encephalopathy                                                                             |
| incode1_dad_incode   | 1VG53LAPNN             | 1042    | 39 | 1.3929 | Implantation of internal device, knee joint with synthetic material (e.g. bone paste, cement, Dynagraft, Osteoset) using dual component prosthetic device |
| feecode_ohip_fee     | W010                   | 43651   | 41 | 1.3908 | MONTHLY MANAGEMENT FEE - LTC                                                                                                                              |
| feecode_ohip_fee     | G313                   | 689643  | 42 | 1.3876 | D./T.PROC CARDIOV ECG PROF.COMP-G.P.                                                                                                                      |
| feecode_ohip_fee     | X090                   | 99519   | 43 | 1.3864 | DIAGNOSTIC RADIOLOGY CHEST SINGLE VIEW                                                                                                                    |
| feecode_ohip_fee     | L061                   | 50668   | 44 | 1.3584 | LAB. MED.-BIOCHEM.-CO2 CONTENT, CO2 COMBINING POWER BICARB.                                                                                               |
| feecode_ohip_fee     | L045                   | 185370  | 45 | 1.3368 | LAB. MED.-BIOCHEM.-CALCIUM                                                                                                                                |
| feecode_ohip_fee     | H105                   | 43180   | 46 | 1.3241 | INTERIM INPATIENT ADMISSION ORDERS                                                                                                                        |
| feecode_ohip_fee     | L700                   | 1254713 | 47 | 1.3196 | LAB. MED.-PATIENT DOCUMENTATION & SPECIMEN COLLECTION FEE                                                                                                 |
| subclnam_odb_hdps    | PROTON PUMP INHIBITORS | 414010  | 48 | 1.3171 | PROTON PUMP INHIBITORS                                                                                                                                    |

|                      |                   |        |    |        |                                                                                                                                                                                   |
|----------------------|-------------------|--------|----|--------|-----------------------------------------------------------------------------------------------------------------------------------------------------------------------------------|
| feecode_ohip_fee     | E083              | 83542  | 49 | 1.3132 | Subsequent visit by the MRP, to subsequent visit, C122, C123, C124, C142, C143, C882 or C982                                                                                      |
| feecode_ohip_fee     | L061              | 50668  | 50 | 1.3041 | LAB. MED.-BIOCHEM.-CO2 CONTENT, CO2 COMBINING POWER BICARB.                                                                                                                       |
| subclnam_odb_hdps    | STOOL SOFTENERS   | 130707 | 52 | 1.3029 | STOOL SOFTENERS                                                                                                                                                                   |
| incode1_dad_incode   | 1QT87BAGX         | 981    | 52 | 1.3029 | Excision partial, prostate endoscopic per orifice approach [transurethral] using device NEC                                                                                       |
| incode1_nacrs_incode | 3OT30DA           | 7539   | 52 | 1.3029 | Ultrasound, abdominal cavity alone                                                                                                                                                |
| feecode_ohip_fee     | L194              | 88378  | 54 | 1.3022 | LAB. MED.-BIOCHEM.-PHOSPHORUS                                                                                                                                                     |
| subclnam_odb_hdps    | INSULINS          | 61768  | 56 | 1.2957 | INSULINS                                                                                                                                                                          |
| incode1_dad_incode   | 1NQ87BA           | 3537   | 56 | 1.2957 | Excision partial, rectum endoscopic per orifice approach closure by apposition technique [e.g. suturing, stapling] or no closure required (for tissue regeneration)               |
| incode1_nacrs_incode | 1ZZ35HAJ2         | 154    | 56 | 1.2957 | Pharmacotherapy, total body hormonal agents, excluding sex hormones percutaneous approach [intramuscular, intravenous, subcutaneous, intradermal] corticosteroid agent (systemic) |
| feecode_ohip_fee     | L053              | 744496 | 58 | 1.2842 | LAB. MED.-BIOCHEM.-CHLORIDE                                                                                                                                                       |
| feecode_ohip_fee     | L045              | 185370 | 59 | 1.2741 | LAB. MED.-BIOCHEM.-CALCIUM                                                                                                                                                        |
| feecode_ohip_fee     | L628              | 60796  | 60 | 1.2667 | LAB. MED.-MICROBIOL.-CULTURES-OTHER SWABS-CULT. AND SMEAR                                                                                                                         |
| subclnam_odb_hdps    | IRON PREPARATIONS | 95479  | 62 | 1.2659 | IRON PREPARATIONS                                                                                                                                                                 |
| incode1_dad_incode   | 1NQ87BAFA         | 696    | 62 | 1.2659 | Excision partial, rectum endoscopic per orifice approach encircage device                                                                                                         |
| incode1_nacrs_incode | 1ZZ35HAK0         | 375    | 62 | 1.2659 | Pharmacotherapy, total body general antiinfective agents percutaneous approach [intramuscular, intravenous, subcutaneous, intradermal] antiinfective NOS                          |
| dxcode_ohip_dx       | 584               | 14702  | 64 | 1.2552 | Acute renal failure                                                                                                                                                               |
| feecode_ohip_fee     | C002              | 71601  | 66 | 1.2501 | SUBSEQ.VISITS-TO 5WKS-F.P./G.P.-HOSP.                                                                                                                                             |
| dxcode_ohip_dx       | 437               | 7846   | 66 | 1.2501 | Chronic arteriosclerotic cerebrovascular disease, hypertensive encephalopathy                                                                                                     |
| incode1_dad_incode   | 1VG53LAPNN        | 1042   | 66 | 1.2501 | Implantation of internal device, knee joint with synthetic material (e.g. bone paste, cement, Dynagraft, Osteoset) using dual component prosthetic device                         |
| feecode_ohip_fee     | L208              | 47045  | 68 | 1.2490 | LAB. MED.-BIOCHEM.PROTEIN TOTAL NOT WITH L085 OR L086                                                                                                                             |
| feecode_ohip_fee     | L194              | 88378  | 69 | 1.2489 | LAB. MED.-BIOCHEM.-PHOSPHORUS                                                                                                                                                     |
| feecode_ohip_fee     | L226              | 899632 | 70 | 1.2428 | LAB. MED.-BIOCHEM.-SODIUM                                                                                                                                                         |

|                      |                                  |        |    |        |                                                                                                            |
|----------------------|----------------------------------|--------|----|--------|------------------------------------------------------------------------------------------------------------|
| feecode_ohip_fee     | G313                             | 689643 | 71 | 1.2394 | D./T.PROC CARDIOV ECG<br>PROF.COMP-G.P.                                                                    |
| feecode_ohip_fee     | L204                             | 936324 | 72 | 1.2314 | LAB. MED.-BIOCHEM.-<br>POTASSIUM                                                                           |
| subclnam_odb_hdps    | NARCOTICS:<br>OPIATE<br>AGONISTS | 345857 | 74 | 1.2255 | NARCOTICS: OPIATE AGONISTS                                                                                 |
| dx10code1_nacrs_icd1 | I471                             | 1207   | 74 | 1.2255 | Supraventricular tachycardia                                                                               |
| incode1_nacrs_incode | 2HZ24JAXJ                        | 25058  | 74 | 1.2255 | Electrophysiological measurement,<br>heart external application using<br>recording electrodes (or ECG NOS) |
| feecode_ohip_fee     | G395                             | 37845  | 76 | 1.2228 | D./T. PROC-OTHER<br>RESUSCITATION-1ST 1/4HR. PER<br>PHYS.                                                  |
| feecode_ohip_fee     | E078                             | 160286 | 77 | 1.2143 | MEDSPECASSESS&RE-<br>ASSESS,COMPLEXMEDSPEC RE-<br>ASSESS&PART ASSES                                        |
| subclnam_odb_hdps    | PROTON PUMP<br>INHIBITORS        | 414010 | 78 | 1.2111 | PROTON PUMP INHIBITORS                                                                                     |
| subclnam_odb_hdps    | STOOL<br>SOFTENERS               | 130707 | 80 | 1.2109 | STOOL SOFTENERS                                                                                            |
| incode1_dad_incode   | 1QT87BAGX                        | 981    | 80 | 1.2109 | Excision partial, prostate endoscopic<br>per orifice approach [transurethral]<br>using device NEC          |
| incode1_nacrs_incode | 3OT30DA                          | 7539   | 80 | 1.2109 | Ultrasound, abdominal cavity alone                                                                         |
| subclnam_odb_hdps    | NARCOTICS:<br>OPIATE<br>AGONISTS | 345857 | 83 | 1.2078 | NARCOTICS: OPIATE AGONISTS                                                                                 |
| dx10code1_nacrs_icd1 | I471                             | 1207   | 83 | 1.2078 | Supraventricular tachycardia                                                                               |
| incode1_nacrs_incode | 2HZ24JAXJ                        | 25058  | 83 | 1.2078 | Electrophysiological measurement,<br>heart external application using<br>recording electrodes (or ECG NOS) |
| dxcode_ohip_dx       | 486                              | 61513  | 86 | 1.2051 | Pneumonia - all types                                                                                      |
| dx10code1_nacrs_icd1 | K922                             | 5157   | 86 | 1.2051 | Gastrointestinal haemorrhage,<br>unspecified                                                               |
| incode1_dad_incode   | 1YB87LA                          | 355    | 86 | 1.2051 | Excision partial, skin of forehead<br>open [excisional] approach without<br>tissue repair                  |
| subclnam_odb_hdps    | NARCOTICS:<br>OPIATE<br>AGONISTS | 345857 | 89 | 1.2046 | NARCOTICS: OPIATE AGONISTS                                                                                 |
| dx10code1_nacrs_icd1 | I471                             | 1207   | 89 | 1.2046 | Supraventricular tachycardia                                                                               |
| incode1_nacrs_incode | 2HZ24JAXJ                        | 25058  | 89 | 1.2046 | Electrophysiological measurement,<br>heart external application using<br>recording electrodes (or ECG NOS) |
| feecode_ohip_fee     | L329                             | 431924 | 91 | 1.2033 | LAB. MED.-RADIO ASSAYS-<br>FERRITIN                                                                        |
| feecode_ohip_fee     | H103                             | 153763 | 92 | 1.2006 | MULTIPLE SYSTEMS<br>ASSESSMENT-G.P.-<br>EMERGENCY-DR. ON DUTY                                              |
| feecode_ohip_fee     | K070                             | 52771  | 93 | 1.1925 | HOME CARE APPLICATION                                                                                      |
| feecode_ohip_fee     | E078                             | 160286 | 94 | 1.1921 | MEDSPECASSESS&RE-<br>ASSESS,COMPLEXMEDSPEC RE-<br>ASSESS&PART ASSES                                        |
| feecode_ohip_fee     | L445                             | 159426 | 95 | 1.1916 | LAB. MED.-HEMATOLOGY-<br>PROTHROMBIN TIME                                                                  |

|                      |                        |         |     |        |                                                                                             |
|----------------------|------------------------|---------|-----|--------|---------------------------------------------------------------------------------------------|
| feecode_ohip_fee     | E078                   | 160286  | 96  | 1.1903 | MEDSPECASSESS&RE-ASSESS,COMPLEXMEDSPEC RE-ASSESS&PART ASSES                                 |
| feecode_ohip_fee     | W010                   | 43651   | 97  | 1.1864 | MONTHLY MANAGEMENT FEE - LTC                                                                |
| feecode_ohip_fee     | G310                   | 655073  | 98  | 1.1842 | D./T.PROC.CARDIOV.ECG TECHNICAL COMP.                                                       |
| feecode_ohip_fee     | L005                   | 437299  | 99  | 1.1835 | LAB. MED.-BIOCHEM.-ALBUMIN, QUANTITATIVE                                                    |
| subclnam_odb_hdps    | ANTI-CHOLINERGIC S     | 94866   | 101 | 1.1819 | ANTI-CHOLINERGICS                                                                           |
| incode1_dad_incode   | 1CL59LAAG              | 3097    | 101 | 1.1819 | Destruction, lens using open approach and laser                                             |
| incode1_nacrs_incode | 1GZ35CAR3              | 4745    | 101 | 1.1819 | Pharmacotherapy (local), respiratory system NEC using antiasthmatic agent                   |
| subclnam_odb_hdps    | DIABETES DIAGNOSTIC    | 243477  | 104 | 1.1818 | DIABETES DIAGNOSTIC                                                                         |
| dx10code1_dad_icd10  | D126                   | 4060    | 104 | 1.1818 | Benign neoplasm of colon, unspecified                                                       |
| incode1_nacrs_incode | 1YT80LA                | 941     | 104 | 1.1818 | Repair, skin of arm using apposition technique [suture]                                     |
| subclnam_odb_hdps    | DIABETES DIAGNOSTIC    | 243477  | 107 | 1.1782 | DIABETES DIAGNOSTIC                                                                         |
| dx10code1_dad_icd10  | D126                   | 4060    | 107 | 1.1782 | Benign neoplasm of colon, unspecified                                                       |
| incode1_nacrs_incode | 1YT80LA                | 941     | 107 | 1.1782 | Repair, skin of arm using apposition technique [suture]                                     |
| subclnam_odb_hdps    | PROTON PUMP INHIBITORS | 414010  | 109 | 1.1737 | PROTON PUMP INHIBITORS                                                                      |
| dxcode_ohip_dx       | 486                    | 61513   | 111 | 1.1726 | Pneumonia - all types                                                                       |
| dx10code1_nacrs_icd1 | K922                   | 5157    | 111 | 1.1726 | Gastrointestinal haemorrhage, unspecified                                                   |
| incode1_dad_incode   | 1YB87LA                | 355     | 111 | 1.1726 | Excision partial, skin of forehead open [excisional] approach without tissue repair         |
| feecode_ohip_fee     | X101                   | 43926   | 113 | 1.1715 | DIAG.RADIOLOGY ABDOMEN TWO/MORE VIEWS                                                       |
| feecode_ohip_fee     | L005                   | 437299  | 114 | 1.1702 | LAB. MED.-BIOCHEM.-ALBUMIN, QUANTITATIVE                                                    |
| feecode_ohip_fee     | L111                   | 1046611 | 115 | 1.1678 | LAB.MED-BIOCHEM.GLUKOSE QUANTITATIVE (NOT DIPSTICK)                                         |
| feecode_ohip_fee     | L208                   | 47045   | 116 | 1.1641 | LAB. MED.-BIOCHEM.PROTEIN TOTAL NOT WITH L085 OR L086                                       |
| subclnam_odb_hdps    | STOOL SOFTENERS        | 130707  | 118 | 1.1636 | STOOL SOFTENERS                                                                             |
| incode1_dad_incode   | 1QT87BAGX              | 981     | 118 | 1.1636 | Excision partial, prostate endoscopic per orifice approach [transurethral] using device NEC |
| incode1_nacrs_incode | 3OT30DA                | 7539    | 118 | 1.1636 | Ultrasound, abdominal cavity alone                                                          |
| subclnam_odb_hdps    | NUTRITIONAL PRODUCTS   | 4509    | 122 | 1.1575 | NUTRITIONAL PRODUCTS                                                                        |
| dxcode_ohip_dx       | 277                    | 13103   | 122 | 1.1575 | Other metabolic disorders                                                                   |
| dx10code1_dad_icd10  | H250                   | 650     | 122 | 1.1575 | Senile incipient cataract                                                                   |
| dx10code1_nacrs_icd1 | I500                   | 13231   | 122 | 1.1575 | Congestive heart failure                                                                    |
| incode1_nacrs_incode | 3AN20WA                | 20601   | 122 | 1.1575 | Computerized tomography [CT], brain without enhancement (contrast)                          |

|                      |                      |         |     |        |                                                                                                                                                                                   |
|----------------------|----------------------|---------|-----|--------|-----------------------------------------------------------------------------------------------------------------------------------------------------------------------------------|
| feecode_ohip_fee     | L067                 | 1105505 | 125 | 1.1568 | LAB. MED.-BIOCHEM-CREATININE (NOT WITH L068).                                                                                                                                     |
| feecode_ohip_fee     | H133                 | 85680   | 126 | 1.1565 | PHYSICIAN ON DUTY IN ER - EVENINGS (18:00-24:00)                                                                                                                                  |
| subclnam_odb_hdps    | INSULINS             | 61768   | 128 | 1.1562 | INSULINS                                                                                                                                                                          |
| incode1_dad_incode   | 1NQ87BA              | 3537    | 128 | 1.1562 | Excision partial, rectum endoscopic per orifice approach closure by apposition technique [e.g. suturing, stapling] or no closure required (for tissue regeneration)               |
| incode1_nacrs_incode | 1ZZ35HAJ2            | 154     | 128 | 1.1562 | Pharmacotherapy, total body hormonal agents, excluding sex hormones percutaneous approach [intramuscular, intravenous, subcutaneous, intradermal] corticosteroid agent (systemic) |
| feecode_ohip_fee     | H153                 | 111275  | 130 | 1.1537 | EMERG.DEPT.PHYS.ON DUTY SAT./SUN/HOLIDAY MULT.SYST.ASSESS.                                                                                                                        |
| subclnam_odb_hdps    | DIABETES DIAGNOSTIC  | 243477  | 132 | 1.1517 | DIABETES DIAGNOSTIC                                                                                                                                                               |
| dx10code1_dad_icd10  | D126                 | 4060    | 132 | 1.1517 | Benign neoplasm of colon, unspecified                                                                                                                                             |
| incode1_nacrs_incode | 1YT80LA              | 941     | 132 | 1.1517 | Repair, skin of arm using apposition technique [suture]                                                                                                                           |
| feecode_ohip_fee     | W010                 | 43651   | 134 | 1.1474 | MONTHLY MANAGEMENT FEE - LTC                                                                                                                                                      |
| feecode_ohip_fee     | X400                 | 83852   | 135 | 1.1473 | DIAG.RADIOLOGY-COMPUTED TOMOGRAHHY-HEAD-WITHOUT I.V.CONTRAST                                                                                                                      |
| feecode_ohip_fee     | X407                 | 47339   | 136 | 1.1469 | DIAG. RADIOLOGY-COMPUTED TOMOGRAPHY-THORAX-WITH I.V.CONTR.                                                                                                                        |
| feecode_ohip_fee     | J128                 | 57753   | 137 | 1.1447 | DIAG. ULTRASOUND-ABDOMEN-ABDOMINAL SCAN - LIMITED STUDY.                                                                                                                          |
| feecode_ohip_fee     | L700                 | 1254713 | 138 | 1.1432 | LAB. MED.-PATIENT DOCUMENTATION & SPECIMEN COLLECTION FEE                                                                                                                         |
| feecode_ohip_fee     | X410                 | 61440   | 139 | 1.1426 | DIAG. RADIOLOGY-COMPUTED TOMOGRAPHY-ABDOMEN-WITH I.V.CONTR.                                                                                                                       |
| dxcode_ohip_dx       | 785                  | 240003  | 140 | 1.1409 | Chest pain, tachycardia, syncope, shock, edema, masses                                                                                                                            |
| feecode_ohip_fee     | G310                 | 655073  | 141 | 1.1402 | D./T.PROC.CARDIOV.ECG TECHNICAL COMP.                                                                                                                                             |
| feecode_ohip_fee     | H102                 | 42462   | 142 | 1.1398 | COMPREHENSIVE ASSESS. & CARE                                                                                                                                                      |
| subclnam_odb_hdps    | ANTILIPEMIC: STATINS | 717706  | 144 | 1.1396 | ANTILIPEMIC: STATINS                                                                                                                                                              |
| incode1_dad_incode   | 1FE89LA              | 764     | 144 | 1.1396 | Excision total, tooth using incision [to remove erupted or soft tissue covered tooth]                                                                                             |
| incode1_nacrs_incode | 1TA03JASQ            | 213     | 144 | 1.1396 | Immobilization, shoulder joint using sling                                                                                                                                        |
| dx10code1_nacrs_icd1 | N179                 | 2364    | 146 | 1.1394 | Acute renal failure, unspecified                                                                                                                                                  |
| feecode_ohip_fee     | L634                 | 309103  | 147 | 1.1376 | LAB.MED-MICROBIOL.-CULTURES-URINE,INCL.CALIBR.LOOP QUANTITN.                                                                                                                      |

|                      |                                            |         |     |        |                                                                                                                                                  |
|----------------------|--------------------------------------------|---------|-----|--------|--------------------------------------------------------------------------------------------------------------------------------------------------|
| feecode_ohip_fee     | J135                                       | 123328  | 148 | 1.1351 | DIAG.ULTRASOUND ABD./RETROPERIT-ABDOMIN.SCAN COMPLETE                                                                                            |
| feecode_ohip_fee     | J202                                       | 67876   | 149 | 1.1350 | DIAG.ULTRASOUND-DUPLEX SCAN SIMULT.REAL TIME.B MOD.PERIP.ART                                                                                     |
| feecode_ohip_fee     | L393                                       | 1055280 | 150 | 1.1346 | LAB.MED-HEMATOLOGY-COMplete BLOOD COUNT                                                                                                          |
| feecode_ohip_fee     | X232                                       | 60551   | 151 | 1.1346 | DIAG.RAD.-PELVIS WITH I.V. CONTRAST                                                                                                              |
| feecode_ohip_fee     | L309                                       | 83329   | 152 | 1.1326 | LAB.MED-RADIOASSAYS-FOLATE INC.SERUM FOLATE + HEMATOCRIT                                                                                         |
| feecode_ohip_fee     | L634                                       | 309103  | 153 | 1.1311 | LAB.MED-MICROBIOL.-CULTURES-URINE,INCL.CALIBR.LOOP QUANTITN.                                                                                     |
| feecode_ohip_fee     | H123                                       | 65147   | 154 | 1.1292 | EMERG.DEPT.PHYS.ON DUTY 12MN-8AM MULT.SYST.ASSESS.                                                                                               |
| feecode_ohip_fee     | H104                                       | 38460   | 155 | 1.1278 | GP-REASSESS-EMERG DEPT-PHYSICIAN ON DUTY M-F DAYS                                                                                                |
| subclnam_odb_hdps    | SULFONAMIDES, TRIMETROPRIM AND COMBINATION | 66971   | 157 | 1.1275 | SULFONAMIDES, TRIMETROPRIM AND COMBINATION                                                                                                       |
| dx10code1_nacrs_icd1 | J069                                       | 7293    | 157 | 1.1275 | Acute upper respiratory infection, unspecified                                                                                                   |
| incode1_nacrs_incode | 3PC20WA                                    | 656     | 157 | 1.1275 | Computerized tomography [CT], kidney without enhancement (contrast)                                                                              |
| feecode_ohip_fee     | L329                                       | 431924  | 159 | 1.1263 | LAB. MED.-RADIO ASSAYS-FERRITIN                                                                                                                  |
| feecode_ohip_fee     | G571                                       | 218907  | 160 | 1.1253 | ECHOCARDIOGRAPHY COMPL.STUDY 1&2DIM PROF.COMP.P1                                                                                                 |
| feecode_ohip_fee     | G578                                       | 218726  | 161 | 1.1242 | CARD.DOPPLER&COMPL.1&2DIM ECHOCARDIOGRAPHY PRO.COMP.P1                                                                                           |
| feecode_ohip_fee     | L165                                       | 62715   | 162 | 1.1130 | LAB. MED.-BIOCHEM.-MAGNESIUM                                                                                                                     |
| subclnam_odb_hdps    | ANTIBIOTICS                                | 110145  | 164 | 1.1086 | ANTIBIOTICS                                                                                                                                      |
| incode1_dad_incode   | 1CL89VRLN                                  | 1613    | 164 | 1.1086 | Excision total, lens extracapsular phacoemulsification technique with insertion of rigid posterior chamber lens prosthesis (e.g. sulcus fixated) |
| incode1_nacrs_incode | 1KX53HAFT                                  | 1364    | 164 | 1.1086 | Implantation of internal device, vein NEC of intravenous catheter using percutaneous approach                                                    |
| subclnam_odb_hdps    | ANTI-CHOLINERGICS                          | 94866   | 167 | 1.1072 | ANTI-CHOLINERGICS                                                                                                                                |
| incode1_dad_incode   | 1CL59LAAG                                  | 3097    | 167 | 1.1072 | Destruction, lens using open approach and laser                                                                                                  |
| incode1_nacrs_incode | 1GZ35CAR3                                  | 4745    | 167 | 1.1072 | Pharmacotherapy (local), respiratory system NEC using antiasthmatic agent                                                                        |
| feecode_ohip_fee     | L253                                       | 589846  | 169 | 1.1048 | LAB. MED.-BIOCHEM.-URINALYSIS, ROUTINE                                                                                                           |

|                       |                                                  |        |     |        |                                                                                                                                                                     |
|-----------------------|--------------------------------------------------|--------|-----|--------|---------------------------------------------------------------------------------------------------------------------------------------------------------------------|
| subclnam_odb_hdps     | ANTIDIARRHEA                                     | 12570  | 170 | 1.1044 | ANTIDIARRHEA                                                                                                                                                        |
| feecode_ohip_fee      | L191                                             | 646231 | 171 | 1.1018 | LAB. MED.-BIOCHEM.-PHOSPHATASE, ALKALINE                                                                                                                            |
| feecode_ohip_fee      | L252                                             | 462605 | 172 | 1.1003 | LAB. MED.-BIOCHEM.-URIC ACID                                                                                                                                        |
| dxcode_ohip_dx        | 785                                              | 240003 | 173 | 1.0963 | Chest pain, tachycardia, syncope, shock, edema, masses                                                                                                              |
| feecode_ohip_fee      | L341                                             | 821271 | 174 | 1.0957 | LAB. MED.-RADIOASSAYS-TSH                                                                                                                                           |
| feecode_ohip_fee      | L222                                             | 493911 | 175 | 1.0956 | LAB. MED.-BIOCHEM.-SGOT                                                                                                                                             |
| dx10code1_nacrs_iced1 | N19                                              | 1027   | 176 | 1.0938 | Unspecified kidney failure                                                                                                                                          |
| subclnam_odb_hdps     | ANTI-CHOLINERGICS                                | 94866  | 178 | 1.0929 | ANTI-CHOLINERGICS                                                                                                                                                   |
| incode1_dad_incode    | 1CL59LAAG                                        | 3097   | 178 | 1.0929 | Destruction, lens using open approach and laser                                                                                                                     |
| incode1_nacrs_incode  | 1GZ35CAR3                                        | 4745   | 178 | 1.0929 | Pharmacotherapy (local), respiratory system NEC using antiasthmatic agent                                                                                           |
| feecode_ohip_fee      | L445                                             | 159426 | 180 | 1.0922 | LAB. MED.-HEMATOLOGY-PROTHROMBIN TIME                                                                                                                               |
| dxcode_ohip_dx        | 427                                              | 122502 | 181 | 1.0918 | Paroxysmal tachycardia, atrial or ventricular flutter or fibrillation, cardiac arrest, other arrhythmias                                                            |
| subclnam_odb_hdps     | BRONCHODILATOR AND ANTI-INFLAMMATORY COMBINATION | 102306 | 183 | 1.0903 | BRONCHODILATOR AND ANTI-INFLAMMATORY COMBINATION                                                                                                                    |
| dxcode_ohip_dx        | 162                                              | 11934  | 183 | 1.0903 | Bronchus, lung                                                                                                                                                      |
| incode1_nacrs_incode  | 1YB80LA                                          | 1944   | 183 | 1.0903 | Repair, skin of forehead using apposition technique [e.g. suturing, stapling]                                                                                       |
| subclnam_odb_hdps     | SULFONAMIDES, TRIMETOPRIM AND COMBINATION        | 66971  | 186 | 1.0890 | SULFONAMIDES, TRIMETOPRIM AND COMBINATION                                                                                                                           |
| dx10code1_nacrs_iced1 | J069                                             | 7293   | 186 | 1.0890 | Acute upper respiratory infection, unspecified                                                                                                                      |
| incode1_nacrs_incode  | 3PC20WA                                          | 656    | 186 | 1.0890 | Computerized tomography [CT], kidney without enhancement (contrast)                                                                                                 |
| feecode_ohip_fee      | L093                                             | 602368 | 188 | 1.0886 | LAB. MED.-BIOCHEM. GLYCOSYLATED HAEMOGLOBIN                                                                                                                         |
| subclnam_odb_hdps     | INSULINS                                         | 61768  | 190 | 1.0874 | INSULINS                                                                                                                                                            |
| incode1_dad_incode    | 1NQ87BA                                          | 3537   | 190 | 1.0874 | Excision partial, rectum endoscopic per orifice approach closure by apposition technique [e.g. suturing, stapling] or no closure required (for tissue regeneration) |
| incode1_nacrs_incode  | 1ZZ35HAJ2                                        | 154    | 190 | 1.0874 | Pharmacotherapy, total body hormonal agents, excluding sex hormones percutaneous approach [intramuscular, intravenous,                                              |



|                      |                                                  |        |     |        |                                                                                                                                                  |
|----------------------|--------------------------------------------------|--------|-----|--------|--------------------------------------------------------------------------------------------------------------------------------------------------|
|                      |                                                  |        |     |        | subcutaneous, intradermal]<br>corticosteroid agent (systemic)                                                                                    |
| subclnam_odb_hdps    | BRONCHODILATOR AND ANTI-INFLAMMATORY COMBINATION | 102306 | 193 | 1.0858 | BRONCHODILATOR AND ANTI-INFLAMMATORY COMBINATION                                                                                                 |
| dxcode_ohip_dx       | 162                                              | 11934  | 193 | 1.0858 | Bronchus, lung                                                                                                                                   |
| incode1_nacrs_incode | 1YB80LA                                          | 1944   | 193 | 1.0858 | Repair, skin of forehead using apposition technique [e.g. suturing, stapling]                                                                    |
| dxcode_ohip_dx       | 496                                              | 52396  | 196 | 1.0848 | Other chronic obstructive pulmonary disease                                                                                                      |
| dx10code1_nacrs_icd1 | L0300                                            | 836    | 196 | 1.0848 | Cellulitis of finger                                                                                                                             |
| incode1_dad_incode   | 1YD87LAXXE                                       | 511    | 196 | 1.0848 | Excision partial, skin of nose open [excisional] approach using local flap [e.g. advancement, transposition or rotation flap]                    |
| subclnam_odb_hdps    | ANTIBIOTICS                                      | 110145 | 199 | 1.0848 | ANTIBIOTICS                                                                                                                                      |
| incode1_dad_incode   | 1CL89VRLN                                        | 1613   | 199 | 1.0848 | Excision total, lens extracapsular phacoemulsification technique with insertion of rigid posterior chamber lens prosthesis (e.g. sulcus fixated) |
| incode1_nacrs_incode | 1KX53HAFT                                        | 1364   | 199 | 1.0848 | Implantation of internal device, vein NEC of intravenous catheter using percutaneous approach                                                    |

**eTable 5.** Covariates Included in HDPS Score for Matched Subcohort With Known Baseline eGFR and Serum Potassium Values

| Type of Code         | Exact Code Label  | Frequency | Rank | Bias Multiplier | Code description                                                                                                                                         |
|----------------------|-------------------|-----------|------|-----------------|----------------------------------------------------------------------------------------------------------------------------------------------------------|
| feecode_ohip_fee     | L251              | 166674    | 1    | 1.4779          | LAB.MED.-BIOCHEM.-UREA NITROGEN (B.U.N.)                                                                                                                 |
| feecode_ohip_fee     | E083              | 83542     | 2    | 1.4683          | Subsequent visit by the MRP, to subsequent visit, C122, C123, C124, C142, C143, C882 or C982                                                             |
| feecode_ohip_fee     | C124              | 108303    | 3    | 1.4445          | DAY OF DISCHARGE VISIT - MOST RESPONSIBLE PHYS                                                                                                           |
| feecode_ohip_fee     | X091              | 420294    | 4    | 1.4305          | DIAGNOSTIC RADIOLOGY CHEST 2 VIEWS                                                                                                                       |
| feecode_ohip_fee     | E083              | 83542     | 5    | 1.4190          | Subsequent visit by the MRP, to subsequent visit, C122, C123, C124, C142, C143, C882 or C982                                                             |
| feecode_ohip_fee     | L251              | 166674    | 6    | 1.4110          | LAB.MED.-BIOCHEM.-UREA NITROGEN (B.U.N.)                                                                                                                 |
| feecode_ohip_fee     | X090              | 99519     | 7    | 1.3888          | DIAGNOSTIC RADIOLOGY CHEST SINGLE VIEW                                                                                                                   |
| dxcode_ohip_dx       | 584               | 14702     | 8    | 1.3836          | Acute renal failure                                                                                                                                      |
| feecode_ohip_fee     | L800              | 41796     | 9    | 1.3731          | LAB.MED.-ANAT PATH,HIST,CYTO- BLOOD FILM INTERPRETATION                                                                                                  |
| subclnam_odb_hdps    | IRON PREPARATIONS | 95479     | 11   | 1.3567          | IRON PREPARATIONS                                                                                                                                        |
| incode1_dad_incode   | 1NQ87BAFA         | 696       | 11   | 1.3567          | Excision partial, rectum endoscopic per orifice approach encirclage device                                                                               |
| incode1_nacrs_incode | 1ZZ35HAK0         | 375       | 11   | 1.3567          | Pharmacotherapy, total body general antiinfective agents percutaneous approach [intramuscular, intravenous, subcutaneous, intradermal] antiinfective NOS |
| feecode_ohip_fee     | W010              | 43651     | 13   | 1.3510          | MONTHLY MANAGEMENT FEE - LTC                                                                                                                             |
| feecode_ohip_fee     | E083              | 83542     | 14   | 1.3457          | Subsequent visit by the MRP, to subsequent visit, C122, C123, C124, C142, C143, C882 or C982                                                             |
| dxcode_ohip_dx       | 428               | 70502     | 15   | 1.3423          | Congestive heart failure                                                                                                                                 |
| subclnam_odb_hdps    | IRON PREPARATIONS | 95479     | 17   | 1.3218          | IRON PREPARATIONS                                                                                                                                        |
| incode1_dad_incode   | 1NQ87BAFA         | 696       | 17   | 1.3218          | Excision partial, rectum endoscopic per orifice approach encirclage device                                                                               |
| incode1_nacrs_incode | 1ZZ35HAK0         | 375       | 17   | 1.3218          | Pharmacotherapy, total body general antiinfective agents percutaneous approach [intramuscular, intravenous, subcutaneous, intradermal] antiinfective NOS |

|                      |                        |        |    |        |                                                                                                                                                           |
|----------------------|------------------------|--------|----|--------|-----------------------------------------------------------------------------------------------------------------------------------------------------------|
| feecode_ohip_fee     | C002                   | 71601  | 20 | 1.3181 | SUBSEQ.VISITS-TO 5WKS-F.P./G.P.-HOSP.                                                                                                                     |
| dxcode_ohip_dx       | 437                    | 7846   | 20 | 1.3181 | Chronic arteriosclerotic cerebrovascular disease, hypertensive encephalopathy                                                                             |
| incode1_dad_incode   | 1VG53LAPNN             | 1042   | 20 | 1.3181 | Implantation of internal device, knee joint with synthetic material (e.g. bone paste, cement, Dynagraft, Osteoset) using dual component prosthetic device |
| dx10code1_dad_icd10  | H409                   | 1490   | 23 | 1.3123 | Glaucoma, unspecified                                                                                                                                     |
| incode1_dad_incode   | 1PM59BAAG              | 301    | 23 | 1.3123 | Destruction, bladder endoscopic per orifice approach using laser                                                                                          |
| incode1_nacrs_incode | 3GY10VA                | 138556 | 23 | 1.3123 | Xray, thoracic cavity NEC without contrast (with or without fluoroscopy)                                                                                  |
| dxcode_ohip_dx       | 428                    | 70502  | 25 | 1.3118 | Congestive heart failure                                                                                                                                  |
| feecode_ohip_fee     | X090                   | 99519  | 26 | 1.3052 | DIAGNOSTIC RADIOLOGY CHEST SINGLE VIEW                                                                                                                    |
| dxcode_ohip_dx       | 584                    | 14702  | 27 | 1.2885 | Acute renal failure                                                                                                                                       |
| subclnam_odb_hdps    | ANTIPSYCHOTIC AGENTS   | 66382  | 30 | 1.2636 | ANTIPSYCHOTIC AGENTS                                                                                                                                      |
| feecode_ohip_fee     | A135                   | 217035 | 30 | 1.2636 | CONSULT.-INTERNAL MED.                                                                                                                                    |
| dx10code1_dad_icd10  | C541                   | 617    | 30 | 1.2636 | Malignant neoplasm of endometrium                                                                                                                         |
| incode1_dad_incode   | 1FU89NZ                | 479    | 30 | 1.2636 | Excision total, thyroid gland open approach [e.g. neck incision] using device NEC                                                                         |
| incode1_nacrs_incode | 1TV73JA                | 840    | 30 | 1.2636 | Reduction, radius and ulna using closed (external) approach                                                                                               |
| dxcode_ohip_dx       | 428                    | 70502  | 33 | 1.2619 | Congestive heart failure                                                                                                                                  |
| feecode_ohip_fee     | X091                   | 420294 | 34 | 1.2586 | DIAGNOSTIC RADIOLOGY CHEST 2 VIEWS                                                                                                                        |
| feecode_ohip_fee     | L045                   | 185370 | 35 | 1.2436 | LAB. MED.-BIOCHEM.-CALCIUM                                                                                                                                |
| feecode_ohip_fee     | L061                   | 50668  | 36 | 1.2389 | LAB. MED.-BIOCHEM.-CO2 CONTENT, CO2 COMBINING POWER BICARB.                                                                                               |
| feecode_ohip_fee     | L061                   | 50668  | 37 | 1.2336 | LAB. MED.-BIOCHEM.-CO2 CONTENT, CO2 COMBINING POWER BICARB.                                                                                               |
| feecode_ohip_fee     | C002                   | 71601  | 39 | 1.2286 | SUBSEQ.VISITS-TO 5WKS-F.P./G.P.-HOSP.                                                                                                                     |
| dxcode_ohip_dx       | 437                    | 7846   | 39 | 1.2286 | Chronic arteriosclerotic cerebrovascular disease, hypertensive encephalopathy                                                                             |
| incode1_dad_incode   | 1VG53LAPNN             | 1042   | 39 | 1.2286 | Implantation of internal device, knee joint with synthetic material (e.g. bone paste, cement, Dynagraft, Osteoset) using dual component prosthetic device |
| subclnam_odb_hdps    | PROTON PUMP INHIBITORS | 414010 | 41 | 1.2282 | PROTON PUMP INHIBITORS                                                                                                                                    |

|                      |                   |        |    |        |                                                                                                                                                                                   |
|----------------------|-------------------|--------|----|--------|-----------------------------------------------------------------------------------------------------------------------------------------------------------------------------------|
| feecode_ohip_fee     | H105              | 43180  | 42 | 1.2280 | INTERIM INPATIENT ADMISSION ORDERS                                                                                                                                                |
| feecode_ohip_fee     | L194              | 88378  | 43 | 1.2278 | LAB. MED.-BIOCHEM.-PHOSPHORUS                                                                                                                                                     |
| subclnam_odb_hdps    | IRON PREPARATIONS | 95479  | 45 | 1.2268 | IRON PREPARATIONS                                                                                                                                                                 |
| incode1_dad_incode   | 1NQ87BAFA         | 696    | 45 | 1.2268 | Excision partial, rectum endoscopic per orifice approach encircilage device                                                                                                       |
| incode1_nacrs_incode | 1ZZ35HAK0         | 375    | 45 | 1.2268 | Pharmacotherapy, total body general antiinfective agents percutaneous approach [intramuscular, intravenous, subcutaneous, intradermal] antiinfective NOS                          |
| feecode_ohip_fee     | L628              | 60796  | 47 | 1.1993 | LAB. MED.-MICROBIOL.-CULTURES-OTHER SWABS-CULT. AND SMEAR                                                                                                                         |
| subclnam_odb_hdps    | STOOL SOFTENERS   | 130707 | 49 | 1.1895 | STOOL SOFTENERS                                                                                                                                                                   |
| incode1_dad_incode   | 1QT87BAGX         | 981    | 49 | 1.1895 | Excision partial, prostate endoscopic per orifice approach [transurethral] using device NEC                                                                                       |
| incode1_nacrs_incode | 3OT30DA           | 7539   | 49 | 1.1895 | Ultrasound, abdominal cavity alone                                                                                                                                                |
| dxcode_ohip_dx       | 584               | 14702  | 51 | 1.1844 | Acute renal failure                                                                                                                                                               |
| feecode_ohip_fee     | W010              | 43651  | 52 | 1.1765 | MONTHLY MANAGEMENT FEE - LTC                                                                                                                                                      |
| feecode_ohip_fee     | E078              | 160286 | 53 | 1.1714 | MEDSPECASSESS&RE-ASSESS,COMPLEXMEDSPEC RE-ASSESS&PART ASSES                                                                                                                       |
| subclnam_odb_hdps    | INSULINS          | 61768  | 55 | 1.1711 | INSULINS                                                                                                                                                                          |
| incode1_dad_incode   | 1NQ87BA           | 3537   | 55 | 1.1711 | Excision partial, rectum endoscopic per orifice approach closure by apposition technique [e.g. suturing, stapling] or no closure required (for tissue regeneration)               |
| incode1_nacrs_incode | 1ZZ35HAJ2         | 154    | 55 | 1.1711 | Pharmacotherapy, total body hormonal agents, excluding sex hormones percutaneous approach [intramuscular, intravenous, subcutaneous, intradermal] corticosteroid agent (systemic) |
| feecode_ohip_fee     | E078              | 160286 | 57 | 1.1645 | MEDSPECASSESS&RE-ASSESS,COMPLEXMEDSPEC RE-ASSESS&PART ASSES                                                                                                                       |
| feecode_ohip_fee     | E078              | 160286 | 58 | 1.1613 | MEDSPECASSESS&RE-ASSESS,COMPLEXMEDSPEC RE-ASSESS&PART ASSES                                                                                                                       |
| feecode_ohip_fee     | L194              | 88378  | 59 | 1.1608 | LAB. MED.-BIOCHEM.-PHOSPHORUS                                                                                                                                                     |
| feecode_ohip_fee     | L045              | 185370 | 60 | 1.1558 | LAB. MED.-BIOCHEM.-CALCIUM                                                                                                                                                        |

|                      |                            |        |    |        |                                                                                                                                                           |
|----------------------|----------------------------|--------|----|--------|-----------------------------------------------------------------------------------------------------------------------------------------------------------|
| feecode_ohip_fee     | G395                       | 37845  | 61 | 1.1558 | D./T. PROC-OTHER RESUSCITATION-1ST 1/4HR. PER PHYS.                                                                                                       |
| feecode_ohip_fee     | C002                       | 71601  | 63 | 1.1463 | SUBSEQ.VISITS-TO 5WKS-F.P./G.P.-HOSP.                                                                                                                     |
| dxcode_ohip_dx       | 437                        | 7846   | 63 | 1.1463 | Chronic arteriosclerotic cerebrovascular disease, hypertensive encephalopathy                                                                             |
| incode1_dad_incode   | 1VG53LAPNN                 | 1042   | 63 | 1.1463 | Implantation of internal device, knee joint with synthetic material (e.g. bone paste, cement, Dynagraft, Osteoset) using dual component prosthetic device |
| subclnam_odb_hdps    | STOOL SOFTENERS            | 130707 | 66 | 1.1461 | STOOL SOFTENERS                                                                                                                                           |
| incode1_dad_incode   | 1QT87BAGX                  | 981    | 66 | 1.1461 | Excision partial, prostate endoscopic per orifice approach [transurethral] using device NEC                                                               |
| incode1_nacrs_incode | 3OT30DA                    | 7539   | 66 | 1.1461 | Ultrasound, abdominal cavity alone                                                                                                                        |
| feecode_ohip_fee     | K002                       | 35038  | 68 | 1.1454 | INTERVIEWS-RELATIVES ON BEHALF OF PATIENT PER 1/2 HOUR                                                                                                    |
| feecode_ohip_fee     | L208                       | 47045  | 69 | 1.1413 | LAB. MED.-BIOCHEM.PROTEIN TOTAL NOT WITH L085 OR L086                                                                                                     |
| feecode_ohip_fee     | W010                       | 43651  | 70 | 1.1403 | MONTHLY MANAGEMENT FEE - LTC                                                                                                                              |
| feecode_ohip_fee     | L812                       | 79646  | 71 | 0.8774 | LAB MED.CYTOLOGY-CERVICOVAG SPEC                                                                                                                          |
| feecode_ohip_fee     | L733                       | 75160  | 72 | 0.8792 | CERVICOVAGINAL SPECIMEN (MONOLAYER CELL METHODOLOGY)                                                                                                      |
| feecode_ohip_fee     | X178                       | 57838  | 73 | 0.8828 | 01OCT1992 - [DIAG. RAD. Intravenous angiocardiology - with quantification]<br>01OCT2010 - [Mammogram - No Signs or Symptoms - bilateral]                  |
| feecode_ohip_fee     | K070                       | 52771  | 74 | 1.1316 | HOME CARE APPLICATION                                                                                                                                     |
| feecode_ohip_fee     | X101                       | 43926  | 75 | 1.1309 | DIAG.RADIOLOGY ABDOMEN TWO/MORE VIEWS                                                                                                                     |
| subclnam_odb_hdps    | NARCOTICS: OPIATE AGONISTS | 345857 | 77 | 1.1277 | NARCOTICS: OPIATE AGONISTS                                                                                                                                |
| dx10code1_nacrs_icd1 | I471                       | 1207   | 77 | 1.1277 | Supraventricular tachycardia                                                                                                                              |
| incode1_nacrs_incode | 2HZ24JAXJ                  | 25058  | 77 | 1.1277 | Electrophysiological measurement, heart external application using recording electrodes (or ECG NOS)                                                      |
| subclnam_odb_hdps    | PROTON PUMP INHIBITORS     | 414010 | 79 | 1.1272 | PROTON PUMP INHIBITORS                                                                                                                                    |
| subclnam_odb_hdps    | STOOL SOFTENERS            | 130707 | 81 | 1.1267 | STOOL SOFTENERS                                                                                                                                           |

|                      |                               |        |     |        |                                                                                                      |
|----------------------|-------------------------------|--------|-----|--------|------------------------------------------------------------------------------------------------------|
| incode1_dad_incode   | 1QT87BAGX                     | 981    | 81  | 1.1267 | Excision partial, prostate endoscopic per orifice approach [transurethral] using device NEC          |
| incode1_nacrs_incode | 3OT30DA                       | 7539   | 81  | 1.1267 | Ultrasound, abdominal cavity alone                                                                   |
| subclnam_odb_hdps    | NARCOTICS:<br>OPIATE AGONISTS | 345857 | 84  | 1.1225 | NARCOTICS: OPIATE AGONISTS                                                                           |
| dx10code1_nacrs_icd1 | I471                          | 1207   | 84  | 1.1225 | Supraventricular tachycardia                                                                         |
| incode1_nacrs_incode | 2HZ24JAXJ                     | 25058  | 84  | 1.1225 | Electrophysiological measurement, heart external application using recording electrodes (or ECG NOS) |
| feecode_ohip_fee     | L329                          | 431924 | 86  | 1.1223 | LAB. MED.-RADIO ASSAYS-FERRITIN                                                                      |
| dxcode_ohip_dx       | 486                           | 61513  | 88  | 1.1222 | Pneumonia - all types                                                                                |
| dx10code1_nacrs_icd1 | K922                          | 5157   | 88  | 1.1222 | Gastrointestinal haemorrhage, unspecified                                                            |
| incode1_dad_incode   | 1YB87LA                       | 355    | 88  | 1.1222 | Excision partial, skin of forehead open [excisional] approach without tissue repair                  |
| dxcode_ohip_dx       | 486                           | 61513  | 91  | 1.1177 | Pneumonia - all types                                                                                |
| dx10code1_nacrs_icd1 | K922                          | 5157   | 91  | 1.1177 | Gastrointestinal haemorrhage, unspecified                                                            |
| incode1_dad_incode   | 1YB87LA                       | 355    | 91  | 1.1177 | Excision partial, skin of forehead open [excisional] approach without tissue repair                  |
| subclnam_odb_hdps    | ANTI-<br>CHOLINERGICS         | 94866  | 94  | 1.1158 | ANTI-CHOLINERGICS                                                                                    |
| incode1_dad_incode   | 1CL59LAAG                     | 3097   | 94  | 1.1158 | Destruction, lens using open approach and laser                                                      |
| incode1_nacrs_incode | 1GZ35CAR3                     | 4745   | 94  | 1.1158 | Pharmacotherapy (local), respiratory system NEC using antiasthmatic agent                            |
| feecode_ohip_fee     | J128                          | 57753  | 96  | 1.1143 | DIAG. ULTRASOUND-ABDOMEN-ABDOMINAL SCAN -LIMITED STUDY.                                              |
| dx10code1_nacrs_icd1 | N179                          | 2364   | 97  | 1.1108 | Acute renal failure, unspecified                                                                     |
| subclnam_odb_hdps    | NUTRITIONAL<br>PRODUCTS       | 4509   | 100 | 1.1097 | NUTRITIONAL PRODUCTS                                                                                 |
| dxcode_ohip_dx       | 277                           | 13103  | 100 | 1.1097 | Other metabolic disorders                                                                            |
| dx10code1_dad_icd10  | H250                          | 650    | 100 | 1.1097 | Senile incipient cataract                                                                            |
| dx10code1_nacrs_icd1 | I500                          | 13231  | 100 | 1.1097 | Congestive heart failure                                                                             |
| incode1_nacrs_incode | 3AN20WA                       | 20601  | 100 | 1.1097 | Computerized tomography [CT], brain without enhancement (contrast)                                   |

|                      |                                            |        |     |        |                                                                                                                                                                     |
|----------------------|--------------------------------------------|--------|-----|--------|---------------------------------------------------------------------------------------------------------------------------------------------------------------------|
| feecode_ohip_fee     | E430                                       | 66310  | 103 | 0.9030 | D/T PROC-PAP SMEAR PERFORMED OUTSIDE OF HOSP-ADD                                                                                                                    |
| feecode_ohip_fee     | L445                                       | 159426 | 104 | 1.1044 | LAB. MED.-HEMATOLOGY-PROTHROMBIN TIME                                                                                                                               |
| feecode_ohip_fee     | L330                                       | 37384  | 105 | 1.1036 | LAB. MED.-RADIOASSAYS-PARATHYROID HORMONE                                                                                                                           |
| subclnam_odb_hdps    | NARCOTICS: OPIATE AGONISTS                 | 345857 | 107 | 1.1026 | NARCOTICS: OPIATE AGONISTS                                                                                                                                          |
| dx10code1_nacrs_icd1 | I471                                       | 1207   | 107 | 1.1026 | Supraventricular tachycardia                                                                                                                                        |
| incode1_nacrs_incode | 2HZ24JAXJ                                  | 25058  | 107 | 1.1026 | Electrophysiological measurement, heart external application using recording electrodes (or ECG NOS)                                                                |
| feecode_ohip_fee     | H103                                       | 153763 | 109 | 1.1014 | MULTIPLE SYSTEMS ASSESSMENT-G.P.-EMERGENCY-DR. ON DUTY                                                                                                              |
| feecode_ohip_fee     | H102                                       | 42462  | 110 | 1.0983 | COMPREHENSIVE ASSESS. & CARE                                                                                                                                        |
| feecode_ohip_fee     | L208                                       | 47045  | 111 | 1.0980 | LAB. MED.-BIOCHEM.PROTEIN TOTAL NOT WITH L085 OR L086                                                                                                               |
| feecode_ohip_fee     | L005                                       | 437299 | 112 | 1.0979 | LAB. MED.-BIOCHEM.-ALBUMIN, QUANTITATIVE                                                                                                                            |
| feecode_ohip_fee     | J202                                       | 67876  | 113 | 1.0903 | DIAG.ULTRASOUND-DUPLEX SCAN SIMULT.REAL TIME.B MOD.PERIP.ART                                                                                                        |
| feecode_ohip_fee     | X400                                       | 83852  | 114 | 1.0885 | DIAG.RADIOLOGY-COMPUTED TOMOGRAPHY-HEAD-WITHOUT I.V.CONTRAST                                                                                                        |
| feecode_ohip_fee     | H133                                       | 85680  | 115 | 1.0881 | PHYSICIAN ON DUTY IN ER - EVENINGS (18:00-24:00)                                                                                                                    |
| feecode_ohip_fee     | H104                                       | 38460  | 116 | 1.0877 | GP-REASSESS-EMERG DEPT-PHYSICIAN ON DUTY M-F DAYS                                                                                                                   |
| subclnam_odb_hdps    | SULFONAMIDES, TRIMETROPRIM AND COMBINATION | 66971  | 118 | 1.0876 | SULFONAMIDES, TRIMETROPRIM AND COMBINATION                                                                                                                          |
| dx10code1_nacrs_icd1 | J069                                       | 7293   | 118 | 1.0876 | Acute upper respiratory infection, unspecified                                                                                                                      |
| incode1_nacrs_incode | 3PC20WA                                    | 656    | 118 | 1.0876 | Computerized tomography [CT], kidney without enhancement (contrast)                                                                                                 |
| subclnam_odb_hdps    | INSULINS                                   | 61768  | 121 | 1.0868 | INSULINS                                                                                                                                                            |
| incode1_dad_incode   | 1NQ87BA                                    | 3537   | 121 | 1.0868 | Excision partial, rectum endoscopic per orifice approach closure by apposition technique [e.g. suturing, stapling] or no closure required (for tissue regeneration) |
| incode1_nacrs_incode | 1ZZ35HAJ2                                  | 154    | 121 | 1.0868 | Pharmacotherapy, total body hormonal agents, excluding sex hormones percutaneous approach [intramuscular,                                                           |

|                      |                            |        |     |        |                                                                           |
|----------------------|----------------------------|--------|-----|--------|---------------------------------------------------------------------------|
|                      |                            |        |     |        | intravenous, subcutaneous, intradermal] corticosteroid agent (systemic)   |
| feecode_ohip_fee     | L330                       | 37384  | 123 | 1.0864 | LAB. MED.-RADIOASSAYS-PARATHYROID HORMONE                                 |
| subclnam_odb_hdps    | PROTON PUMP INHIBITORS     | 414010 | 124 | 1.0839 | PROTON PUMP INHIBITORS                                                    |
| subclnam_odb_hdps    | ACE INHIBITORS COMBINATION | 47144  | 126 | 0.9231 | ACE INHIBITORS COMBINATION                                                |
| feecode_ohip_fee     | A003                       | 452298 | 126 | 0.9231 | GEN. ASSESS. -F.P./G.P.                                                   |
| incodel_nacrs_incode | 1CL59LAAG                  | 183    | 126 | 0.9231 | Destruction, lens using open approach and laser                           |
| feecode_ohip_fee     | X407                       | 47339  | 128 | 1.0827 | DIAG. RADIOLOGY-COMPUTED TOMOGRAPHY-THORAX-WITH I.V.CONTR.                |
| subclnam_odb_hdps    | DIABETES DIAGNOSTIC        | 243477 | 130 | 1.0817 | DIABETES DIAGNOSTIC                                                       |
| dx10code1_dad_icd10  | D126                       | 4060   | 130 | 1.0817 | Benign neoplasm of colon, unspecified                                     |
| incodel_nacrs_incode | 1YT80LA                    | 941    | 130 | 1.0817 | Repair, skin of arm using apposition technique [suture]                   |
| subclnam_odb_hdps    | DIABETES DIAGNOSTIC        | 243477 | 133 | 1.0816 | DIABETES DIAGNOSTIC                                                       |
| dx10code1_dad_icd10  | D126                       | 4060   | 133 | 1.0816 | Benign neoplasm of colon, unspecified                                     |
| incodel_nacrs_incode | 1YT80LA                    | 941    | 133 | 1.0816 | Repair, skin of arm using apposition technique [suture]                   |
| feecode_ohip_fee     | H153                       | 111275 | 135 | 1.0801 | EMERG.DEPT.PHYS.ON DUTY SAT./SUN/HOLIDAY MULT.SYST.ASSASS.                |
| feecode_ohip_fee     | X410                       | 61440  | 136 | 1.0755 | DIAG. RADIOLOGY-COMPUTED TOMOGRAPHY-ABDOMEN-WITH I.V.CONTR.               |
| feecode_ohip_fee     | L634                       | 309103 | 137 | 1.0755 | LAB.MED-MICROBIOL.-CULTURES-URINE,INCL.CALIBR.LOOP QUANTITN.              |
| feecode_ohip_fee     | J135                       | 123328 | 138 | 1.0752 | DIAG.ULTRASOUND ABD./RETROPERIT-ABDOMIN.SCAN COMPLETE                     |
| subclnam_odb_hdps    | ANTI-CHOLINERGICS          | 94866  | 140 | 1.0734 | ANTI-CHOLINERGICS                                                         |
| incodel_dad_incode   | 1CL59LAAG                  | 3097   | 140 | 1.0734 | Destruction, lens using open approach and laser                           |
| incodel_nacrs_incode | 1GZ35CAR3                  | 4745   | 140 | 1.0734 | Pharmacotherapy (local), respiratory system NEC using antiasthmatic agent |
| feecode_ohip_fee     | Q131                       | 42841  | 142 | 0.9323 | MAMMOGRAM TRACKING CODE                                                   |
| feecode_ohip_fee     | L179                       | 109551 | 143 | 0.9323 | TRACKING CODE-COLON CANCER CHECK                                          |



|                      |                                            |        |     |        |                                                                           |
|----------------------|--------------------------------------------|--------|-----|--------|---------------------------------------------------------------------------|
| feecode_ohip_fee     | X232                                       | 60551  | 144 | 1.0717 | DIAG.RAD.-PELVIS WITH I.V. CONTRAST                                       |
| subclnam_odb_hdps    | ANTI-CHOLINERGICS                          | 94866  | 146 | 1.0717 | ANTI-CHOLINERGICS                                                         |
| incode1_dad_incode   | 1CL59LAAG                                  | 3097   | 146 | 1.0717 | Destruction, lens using open approach and laser                           |
| incode1_nacrs_incode | 1GZ35CAR3                                  | 4745   | 146 | 1.0717 | Pharmacotherapy (local), respiratory system NEC using antiasthmatic agent |
| feecode_ohip_fee     | L165                                       | 62715  | 148 | 1.0714 | LAB. MED.-BIOCHEM.-MAGNESIUM                                              |
| subclnam_odb_hdps    | SULFONAMIDES, TRIMETROPRIM AND COMBINATION | 66971  | 150 | 1.0710 | SULFONAMIDES, TRIMETROPRIM AND COMBINATION                                |
| dx10code1_nacrs_icd1 | J069                                       | 7293   | 150 | 1.0710 | Acute upper respiratory infection, unspecified                            |
| incode1_nacrs_incode | 3PC20WA                                    | 656    | 150 | 1.0710 | Computerized tomography [CT], kidney without enhancement (contrast)       |
| subclnam_odb_hdps    | DIABETES DIAGNOSTIC                        | 243477 | 153 | 1.0694 | DIABETES DIAGNOSTIC                                                       |
| dx10code1_dad_icd10  | D126                                       | 4060   | 153 | 1.0694 | Benign neoplasm of colon, unspecified                                     |
| incode1_nacrs_incode | 1YT80LA                                    | 941    | 153 | 1.0694 | Repair, skin of arm using apposition technique [suture]                   |
| feecode_ohip_fee     | H123                                       | 65147  | 155 | 1.0670 | EMERG.DEPT.PHYS.ON DUTY 12MN-8AM MULT.SYST.ASSESS.                        |
| subclnam_odb_hdps    | ANTIDIARRHEA                               | 12570  | 156 | 1.0668 | ANTIDIARRHEA                                                              |
| feecode_ohip_fee     | L309                                       | 83329  | 157 | 1.0660 | LAB.MED-RADIOASSAYS-FOLATE INC.SERUM FOLATE + HEMATOCRIT                  |
| feecode_ohip_fee     | G571                                       | 218907 | 158 | 1.0642 | ECHOCARDIOGRAPHY COMPL.STUDY 1&2DIM PROF.COMP.P1                          |
| feecode_ohip_fee     | G578                                       | 218726 | 159 | 1.0623 | CARD.DOPPLER&COMPL.1&2DIM ECHOCARDIOGRAPHY PRO.COMP.P1                    |
| feecode_ohip_fee     | X155                                       | 127658 | 160 | 0.9417 | BONE MINERAL DENSITY HIGH RISK 2+SITES                                    |
| feecode_ohip_fee     | Q150                                       | 81854  | 161 | 0.9421 | FOBT DISTRIBUTION AND COUNSELLING FEE                                     |
| feecode_ohip_fee     | K132                                       | 61948  | 162 | 0.9434 | Periodic health visit - adult 65 years of age and older                   |
| feecode_ohip_fee     | L634                                       | 309103 | 163 | 1.0577 | LAB.MED-MICROBIOL.-CULTURES-URINE,INCL.CALIBR.LOOP QUANTITN.              |
| subclnam_odb_hdps    | NUTRITIONAL PRODUCTS                       | 4509   | 166 | 1.0560 | NUTRITIONAL PRODUCTS                                                      |

|                      |                                                  |        |     |        |                                                                                                                                                  |
|----------------------|--------------------------------------------------|--------|-----|--------|--------------------------------------------------------------------------------------------------------------------------------------------------|
| dxcode_ohip_dx       | 277                                              | 13103  | 166 | 1.0560 | Other metabolic disorders                                                                                                                        |
| dx10code1_dad_icd10  | H250                                             | 650    | 166 | 1.0560 | Senile incipient cataract                                                                                                                        |
| dx10code1_nacrs_icd1 | I500                                             | 13231  | 166 | 1.0560 | Congestive heart failure                                                                                                                         |
| incode1_nacrs_incode | 3AN20WA                                          | 20601  | 166 | 1.0560 | Computerized tomography [CT], brain without enhancement (contrast)                                                                               |
| subclnam_odb_hdps    | BRONCHODILATOR AND ANTI-INFLAMMATORY COMBINATION | 102306 | 170 | 1.0555 | BRONCHODILATOR AND ANTI-INFLAMMATORY COMBINATION                                                                                                 |
| dxcode_ohip_dx       | 162                                              | 11934  | 170 | 1.0555 | Bronchus, lung                                                                                                                                   |
| incode1_nacrs_incode | 1YB80LA                                          | 1944   | 170 | 1.0555 | Repair, skin of forehead using apposition technique [e.g. suturing, stapling]                                                                    |
| subclnam_odb_hdps    | BRONCHODILATOR AND ANTI-INFLAMMATORY COMBINATION | 102306 | 173 | 1.0550 | BRONCHODILATOR AND ANTI-INFLAMMATORY COMBINATION                                                                                                 |
| dxcode_ohip_dx       | 162                                              | 11934  | 173 | 1.0550 | Bronchus, lung                                                                                                                                   |
| incode1_nacrs_incode | 1YB80LA                                          | 1944   | 173 | 1.0550 | Repair, skin of forehead using apposition technique [e.g. suturing, stapling]                                                                    |
| dxcode_ohip_dx       | 785                                              | 240003 | 175 | 1.0542 | Chest pain, tachycardia, syncope, shock, edema, masses                                                                                           |
| subclnam_odb_hdps    | ANTIBIOTICS                                      | 110145 | 177 | 1.0542 | ANTIBIOTICS                                                                                                                                      |
| incode1_dad_incode   | 1CL89VRLN                                        | 1613   | 177 | 1.0542 | Excision total, lens extracapsular phacoemulsification technique with insertion of rigid posterior chamber lens prosthesis (e.g. sulcus fixated) |
| incode1_nacrs_incode | 1KX53HAFT                                        | 1364   | 177 | 1.0542 | Implantation of internal device, vein NEC of intravenous catheter using percutaneous approach                                                    |
| feecode_ohip_fee     | J163                                             | 49910  | 179 | 1.0523 | PELVIS, LIMITED STUDY OTHER THAN PREGNANCY                                                                                                       |
| feecode_ohip_fee     | L445                                             | 159426 | 180 | 1.0517 | LAB. MED.-HEMATOLOGY-PROTHROMBIN TIME                                                                                                            |
| subclnam_odb_hdps    | BRONCHODILATOR AND ANTI-INFLAMMATORY COMBINATION | 102306 | 182 | 1.0507 | BRONCHODILATOR AND ANTI-INFLAMMATORY COMBINATION                                                                                                 |
| dxcode_ohip_dx       | 162                                              | 11934  | 182 | 1.0507 | Bronchus, lung                                                                                                                                   |
| incode1_nacrs_incode | 1YB80LA                                          | 1944   | 182 | 1.0507 | Repair, skin of forehead using apposition technique [e.g. suturing, stapling]                                                                    |
| subclnam_odb_hdps    | ANGIOTENSIN II ANTAGONIST                        | 238399 | 185 | 1.0501 | ANGIOTENSIN II ANTAGONIST                                                                                                                        |
| incode1_dad_incode   | 1CJ52LAAG                                        | 453    | 185 | 1.0501 | Drainage, anterior chamber (of eye) using laser                                                                                                  |

|                      |                    |        |     |        |                                                                                                                                                                                   |
|----------------------|--------------------|--------|-----|--------|-----------------------------------------------------------------------------------------------------------------------------------------------------------------------------------|
| incode1_nacrs_incode | 1GV52HA            | 221    | 185 | 1.0501 | Drainage, pleura using percutaneous (needle) approach                                                                                                                             |
| subclnam_odb_hdps    | INSULINS           | 61768  | 188 | 1.0489 | INSULINS                                                                                                                                                                          |
| incode1_dad_incode   | 1NQ87BA            | 3537   | 188 | 1.0489 | Excision partial, rectum endoscopic per orifice approach closure by apposition technique [e.g. suturing, stapling] or no closure required (for tissue regeneration)               |
| incode1_nacrs_incode | 1ZZ35HAJ2          | 154    | 188 | 1.0489 | Pharmacotherapy, total body hormonal agents, excluding sex hormones percutaneous approach [intramuscular, intravenous, subcutaneous, intradermal] corticosteroid agent (systemic) |
| dx10code1_nacrs_icd1 | N390               | 24359  | 190 | 1.0484 | Urinary tract infection, site not specified                                                                                                                                       |
| feecode_ohip_fee     | L005               | 437299 | 191 | 1.0467 | LAB. MED.-BIOCHEM.-ALBUMIN, QUANTITATIVE                                                                                                                                          |
| subclnam_odb_hdps    | PARATHYROID AGENTS | 485    | 193 | 1.0466 | PARATHYROID AGENTS                                                                                                                                                                |
| dxcode_ohip_dx       | 289                | 18436  | 193 | 1.0466 | Other diseases of blood, marrow, spleen                                                                                                                                           |
| incode1_nacrs_incode | 3ET10VA            | 305    | 193 | 1.0466 | Xray, nose without contrast (e.g. plain film) (with or without fluoroscopy)                                                                                                       |
| subclnam_odb_hdps    | ANTIMETABOLITES    | 24040  | 196 | 1.0463 | ANTIMETABOLITES                                                                                                                                                                   |
| feecode_ohip_fee     | A131               | 41830  | 196 | 1.0463 | COMPLEX MEDICAL SPECIFIC RE-ASSESSMENT                                                                                                                                            |
| incode1_nacrs_incode | 1TA73JA            | 721    | 196 | 1.0463 | Reduction, shoulder joint using closed (external) approach                                                                                                                        |
| subclnam_odb_hdps    | ANTIBIOTICS        | 110145 | 199 | 1.0452 | ANTIBIOTICS                                                                                                                                                                       |
| incode1_dad_incode   | 1CL89VRLN          | 1613   | 199 | 1.0452 | Excision total, lens extracapsular phacoemulsification technique with insertion of rigid posterior chamber lens prosthesis (e.g. sulcus fixated)                                  |
| incode1_nacrs_incode | 1KX53HAFT          | 1364   | 199 | 1.0452 | Implantation of internal device, vein NEC of intravenous catheter using percutaneous approach                                                                                     |

**eTable 6.** Baseline Characteristics of Sodium Polystyrene Sulfonate (SPS) and Non-SPS Users Post-Matching in the Subcohort With Known Baseline eGFR and Serum Potassium Values

| Characteristic                          | Matched    |             |                             |
|-----------------------------------------|------------|-------------|-----------------------------|
|                                         | SPS (%)    | Control (%) | Std. Diff. (%) <sup>†</sup> |
| <b>Total, N</b>                         | 7,557      | 18,492      |                             |
| <b>Demographics, (%):</b>               |            |             |                             |
| Age (years, mean, SD)                   | 78.3 (7.4) | 78.3 (4.7)  | 0.7                         |
| Men                                     | 55.4       | 55.4        | 0                           |
| Long term care                          | 12.6       | 15.4        | 8                           |
| Reside rurally                          | 14.4       | 11.6        | 8                           |
| <b>Comorbidities, (%):</b>              |            |             |                             |
| Hypertension                            | 54.4       | 52.4        | 4                           |
| Diabetes mellitus                       | 54.4       | 54.4        | 0                           |
| Stroke/transient ischemic attack        | 6.0        | 5.3         | 3                           |
| Atrial fibrillation                     | 7.8        | 8.1         | 1                           |
| Peripheral vascular disease             | 1.6        | 1.4         | 1                           |
| Congestive heart failure                | 9.4        | 9.4         | 0                           |
| Coronary artery disease                 | 19.8       | 19.4        | 1                           |
| Angina                                  | 2.9        | 3.1         | 1                           |
| Prior Acute kidney injury               | 7.8        | 7.8         | 0                           |
| Current dialysis                        | 0.6        | 0.6         | 0                           |
| Gastrointestinal surgery                | 0.8        | 0.8         | 1                           |
| <b>Laboratory values (%):</b>           |            |             |                             |
| Potassium (mEq/L) <sup>††</sup> :       |            |             |                             |
| < 4.0                                   | 1.2        | 2.4         | 8.9                         |
| 4.0 to 4.9                              | 16.8       | 15.6        | 3.2                         |
| 5.0 to 6.0                              | 60.4       | 80.9        | <b>46.2</b>                 |
| > 6.0                                   | 21.5       | 1.0         | <b>68.5</b>                 |
| <b>eGFR (ml/min/1.73m<sup>2</sup>):</b> |            |             |                             |
| <15                                     | 2.7        | 2.7         | 0                           |
| 15 to 29                                | 22.4       | 22.4        | 0                           |
| 30 to 44                                | 32.3       | 32.3        | 0                           |

|                                                                                               |      |      |   |
|-----------------------------------------------------------------------------------------------|------|------|---|
| 45 to 59                                                                                      | 20.2 | 20.2 | 0 |
| 60 to 89                                                                                      | 20.5 | 20.5 | 0 |
| > 90                                                                                          | 1.9  | 1.9  | 0 |
| <b>Access to care (% utilizing the following health service <math>\geq</math> 1 episode):</b> |      |      |   |
| Emergency department visits                                                                   | 70.8 | 66.2 | 8 |
| Hospitalizations                                                                              | 27.5 | 24.1 | 6 |
| Gastroenterologist visits                                                                     | 12.8 | 11.7 | 3 |
| Nephrologist visits                                                                           | 30.9 | 31.1 | 0 |
| Cardiology visits                                                                             | 53.9 | 50.6 | 5 |
| <b>Medications, N (%):</b>                                                                    |      |      |   |
| Angiotensin-converting enzyme (ACE) inhibitors                                                | 49.0 | 45.7 | 6 |
| Non-potassium sparing-diuretic                                                                | 47.1 | 48.1 | 2 |
| Potassium-sparing diuretic                                                                    | 6.9  | 6.9  | 0 |
| Beta blocker                                                                                  | 46.8 | 43.9 | 6 |
| Angiotensin II receptor blocker (ARB)                                                         | 33.2 | 34.9 | 4 |
| Aldosterone receptor antagonist                                                               | 6.0  | 5.4  | 2 |
| Non-steroidal anti-inflammatory agent                                                         | 18.0 | 16.2 | 5 |
| Low molecular weight heparin                                                                  | 0.2  | 0.2  | 0 |

<sup>†</sup>Std. Diff. Standardized differences >10% are statistically significant and bolded. <sup>††</sup> Serum potassium levels were hard matched on categories of < or  $\geq$  5 meq/L

SPS sodium polystyrene sulfonate, % percentage

**eTable 7.** Association Between Sodium Polystyrene Sulfonate (SPS) Use and a Negative Control (Composite of Hospitalization or Emergency Room Visit for Cholecystitis, Diverticulitis or Appendicitis With 30-Day Follow-up)

| <b>Matched cohort<sup>a</sup></b> | <b>Number of events (% total)</b> | <b>Time to event (median, IQR, days)</b> | <b>Incidence rate (95%CI, per 1000 person-years)</b> | <b>HR (95%CI)</b>   |
|-----------------------------------|-----------------------------------|------------------------------------------|------------------------------------------------------|---------------------|
| <b>SPS</b>                        | 86<br>(0.43)                      | 13<br>(6,21)                             | 53.46<br>(42.16-64.76)                               | 1.22<br>(0.89-1.69) |
| <b>No SPS</b>                     | 67<br>(0.33)                      | 17<br>(6,26)                             | 41.02<br>(31.20-50.84)                               |                     |

<sup>a</sup> matched (greedy, without replacement) 1:1 to individuals without SPS on the logit of the HDPS ( $\pm 0.2$  of the standard deviation) and the following: age, sex, chronic dialysis, history of diabetes, heart failure, acute kidney injury, previous hyperkalemia, medication use (beta-blocker, renin angiotensin aldosterone blockade), previous nephrologist visit and index date (within 1 year); additionally adjusted for place of residence
